# Supplementary material for: Synthesis and electronic properties of nitrogen-rich nanographene
Source: Royal Society of Chemistry journal article supplement (doi:10.1039/d4cc01189a), 2024-01-01
Supplement: d4cc01189a1.pdf [file d4cc01189a1.pdf]

## SUPPORTING INFORMATION

### Synthesis and Electronic Properties of Nitrogen-Rich Nanographenes

Gavin P. Heim, Masanari Hirahara, Vidhya Dev, and Theodor Agapie\*

Division of Chemistry and Chemical Engineering, California Institute of Technology, 1200 E California Blvd MC 127-72, Pasadena, California 91125, United States

#### Table of Contents

|                                                                                                                                                |    |
|------------------------------------------------------------------------------------------------------------------------------------------------|----|
| General Considerations                                                                                                                         | 2  |
| <b>Synthetic Procedures</b>                                                                                                                    | 2  |
| Synthesis of <b>5-bromo-2-(3,5-di-<i>tert</i>-butylphenyl)pyrimidine (1a)</b>                                                                  | 3  |
| <b>Figure S1.</b> <sup>1</sup> H NMR of <b>5-bromo-2-(3,5-di-<i>tert</i>-butylphenyl)pyrimidine (1a)</b>                                       | 4  |
| <b>Figure S2.</b> <sup>13</sup> C NMR of <b>5-bromo-2-(3,5-di-<i>tert</i>-butylphenyl)pyrimidine (1a)</b>                                      | 4  |
| Synthesis of <b>1,2-bis(2-(3,5-di-<i>tert</i>-butylphenyl)pyrimidin-5-yl)ethyne (2a)</b>                                                       | 5  |
| <b>Figure S3.</b> <sup>1</sup> H NMR of <b>1,2-bis(2-(3,5-di-<i>tert</i>-butylphenyl)pyrimidin-5-yl)ethyne (2a)</b>                            | 6  |
| <b>Figure S4.</b> <sup>13</sup> C NMR of <b>1,2-bis(2-(3,5-di-<i>tert</i>-butylphenyl)pyrimidin-5-yl)ethyne (2a)</b>                           | 6  |
| Synthesis of <b>1,2,3,4,5,6-hexakis(2-(3,5-di-<i>tert</i>-butylphenyl)pyrimidin-5-yl)benzene (3a).</b>                                         | 7  |
| <b>Figure S5.</b> <sup>1</sup> H NMR of <b>1,2,3,4,5,6-hexakis(2-(3,5-di-<i>tert</i>-butylphenyl)pyrimidin-5-yl)benzene (3a)</b>               | 8  |
| <b>Figure S6.</b> <sup>13</sup> C NMR of <b>1,2,3,4,5,6-hexakis(2-(3,5-di-<i>tert</i>-butylphenyl)pyrimidin-5-yl)benzene (3a)</b>              | 8  |
| <b>General strategy for monitoring the ring closure of 3a and 3b</b>                                                                           | 9  |
| Synthesis of <b>HPC-N<sub>12</sub>(Ar<sup><i>t</i>Bu</sup>)<sub>6</sub></b>                                                                    | 9  |
| <b>Figure S7.</b> <sup>1</sup> H NMR of <b>HPC-N<sub>12</sub>(Ar<sup><i>t</i>Bu</sup>)<sub>6</sub></b>                                         | 10 |
| <b>Figure S8.</b> <sup>13</sup> C NMR of <b>HPC-N<sub>12</sub>(Ar<sup><i>t</i>Bu</sup>)<sub>6</sub></b>                                        | 10 |
| <b>Additional Electrochemistry/Spectroscopy Data</b>                                                                                           | 11 |
| <b>Figure S9.</b> Cyclic voltammogram of <b>HPC-N<sub>12</sub>(Ar<sup><i>t</i>Bu</sup>)<sub>6</sub></b>                                        | 11 |
| <b>Figure S10.</b> Absorption and emission spectra of <b>HPC-N<sub>12</sub>(Ar<sup><i>t</i>Bu</sup>)<sub>6</sub></b> with ZnCl <sub>2</sub>    | 12 |
| <b>Figure S11.</b> Absorption and emission spectra of <b>HPC-N<sub>12</sub>(Ar<sup><i>t</i>Bu</sup>)<sub>6</sub></b> with TfOH                 | 13 |
| <b>Figure S12.</b> Emission spectra of <b>HPC-N<sub>12</sub>(Ar<sup><i>t</i>Bu</sup>)<sub>6</sub></b> with CuBr <sub>2</sub>                   | 14 |
| <b>Figure S13.</b> Absorption spectra of <b>HPC-N<sub>12</sub>(Ar<sup><i>t</i>Bu</sup>)<sub>6</sub></b> with CuBr <sub>2</sub>                 | 14 |
| <b>Figure S14.</b> MALDI-TOF of ZnCl <sub>2</sub> added to <b>HPC-N<sub>12</sub>(Ar<sup><i>t</i>Bu</sup>)<sub>6</sub></b> in CHCl <sub>3</sub> | 15 |
| <b>Figure S15.</b> MALDI-TOF of CuBr <sub>2</sub> added to <b>HPC-N<sub>12</sub>(Ar<sup><i>t</i>Bu</sup>)<sub>6</sub></b> in THF               | 15 |
| <b>Table S1.</b> Comparing redox features in HBC variants                                                                                      | 16 |
| <b>Density Functional Theory Calculations</b>                                                                                                  | 17 |
| <b>Figure S16.</b> Geometry-optimized structures of <b>HPC-N<sub>12</sub>Ph<sub>6</sub></b>                                                    | 17 |
| <b>Figure S17.</b> Geometry-optimized structures of <b>HBC-Ph<sub>6</sub></b>                                                                  | 17 |
| <b>Figure S18.</b> HOMO, HOMO-1, LUMO, and LUMO+1 of <b>HPC-N<sub>12</sub>Ph<sub>6</sub></b>                                                   | 18 |
| <b>Figure S19.</b> HOMO-6 and HOMO-2 for <b>HPC-N<sub>12</sub>Ph<sub>6</sub></b> . Isovalues set to 0.02                                       | 19 |
| <b>Figure S20.</b> HOMO, HOMO-1, LUMO, and LUMO+1 of <b>HBC-Ph<sub>6</sub></b>                                                                 | 20 |
| <b>Figure S21.</b> HOMO-2 for <b>HBC-Ph<sub>6</sub></b> . Isovalue set to 0.02                                                                 | 21 |
| <b>Table S2.</b> HOMO-LUMO energy differences (B3LYP/6-311G(d,p))                                                                              | 22 |
| <b>Table S3.</b> Cartesian coordinates obtained for the optimized geometry of <b>HPC-N<sub>12</sub></b>                                        | 22 |
| <b>Table S4.</b> Cartesian coordinates obtained for the optimized geometry of <b>HPC-N<sub>12</sub>Ph<sub>6</sub></b>                          | 23 |
| <b>Table S5.</b> Cartesian coordinates obtained for the optimized geometry of <b>HBC-Ph<sub>6</sub></b>                                        | 25 |
| <b>Table S6.</b> Cartesian coordinates obtained for the optimized geometry of <b>HBC-Ph<sub>6</sub> (90°)</b>                                  | 27 |
| <b>Table S7.</b> Cartesian coordinates obtained for the optimized geometry of <b>HBC-Ph<sub>6</sub> (45°)</b>                                  | 30 |
| <b>Crystallographic Information</b>                                                                                                            | 33 |
| <b>Refinement Details</b>                                                                                                                      | 34 |
| <b>Table S8.</b> Crystal data and structure refinement for <b>HPC-N<sub>12</sub>(Ar<sup><i>t</i>Bu</sup>)<sub>6</sub></b>                      | 34 |
| <b>Table S9.</b> Comparison of select bond lengths                                                                                             | 35 |
| <b>Figure S22.</b> Additional representations of <b>HPC-N<sub>12</sub>(Ar<sup><i>t</i>Bu</sup>)<sub>6</sub></b> crystal structure              | 36 |
| <b>References</b>                                                                                                                              | 37 |

**General considerations.** Unless otherwise specified, all operations involving air- or water-sensitive reagents were carried out in an MBraun drybox under a nitrogen atmosphere or using standard Schlenk and vacuum line techniques. Glassware was oven-dried at 140 °C for 2 h prior to use on the Schlenk line or in the MBraun drybox. Tetrahydrofuran (THF), diethyl ether, toluene, pentane, and hexanes for air- and moisture-sensitive reactions were dried by the method of Grubbs.<sup>1</sup> Dry *N,N*-dimethylformamide (DMF) was purchased from Millipore Sigma and cannula transferred to freshly-activated 3 Å molecular sieves and stored in a Teflon-sealed Schlenk tube under N<sub>2</sub> atmosphere for 12 h prior to use. *Meta*-xylene was vacuum transferred from sodium benzophenone ketyl. Deuterated solvents were purchased from Cambridge Isotope Laboratories and CDCl<sub>3</sub> was used as received. All solvents, once dried and degassed, were stored under a nitrogen atmosphere over 3 Å molecular sieves. Iodo[bis(diphenylphosphino)-9,9-dimethylxanthene]copper(I) was prepared following a previously reported procedure.<sup>2</sup> All other reagents were used as received. <sup>1</sup>H, and <sup>13</sup>C{<sup>1</sup>H} spectra were recorded on Varian Mercury 300 MHz or Varian 400 MHz spectrometers at ambient temperatures, unless otherwise denoted. <sup>1</sup>H and <sup>13</sup>C{<sup>1</sup>H} NMR spectra are reported referenced internally to residual solvent peaks reported relative to tetramethylsilane. Gas chromatography-mass spectrometry (GC-MS) were performed on an Agilent 6890A instrument using a HP-5MS column (30 m length, 0.25 mm diameter, 0.50 μm film) and an Agilent 5973N mass-selective EI detector. Absorption spectra were recorded on a Varian Cary Bio 50 spectrophotometer.

**Electrochemical measurements:** CVs were recorded with a Pine Instrument Company AFCBP1 biopotentiostat with the AfterMath software package. All measurements were performed in a three electrode cell, which consisted of glassy carbon (working; ø = 3.0 mm), silver wire (counter) and bare platinum wire (reference), in an N<sub>2</sub>-filled MBraun glovebox at RT. Dry tetrahydrofuran that contained ~100 mM [<sup>n</sup>Bu<sub>4</sub>N][PF<sub>6</sub>] was used as the electrolyte solution. The ferrocene/ferrocenium (FcH/FcH<sup>+</sup>) redox wave was used as an internal standard for all measurements.

**Preparation of pre-reduced magnetic stir bars:** Sodium mirror (10-20 mg) is prepared in a 20-mL scintillation vial along with 200-300 mg of benzophenone dissolved in THF to form a purple solution, which is then added to a 20-mL vial containing 10-20 Teflon-coated magnetic stir bars and stirred for 12 h. The solution is decanted, and the stir bars are rinsed with THF until the mother liquor is colorless, resulting in black, pre-reduced magnetic stir bars that are dried under vacuum for 1 h and are to be used for reactions involving Na and NaK.

**Absorption spectroscopy:** UV-vis spectra were recorded on a Varian Cary Bio 50 spectrophotometer in a 1 mm cuvette. Single equivalents of ZnCl<sub>2</sub> (103 mM in CHCl<sub>3</sub>) were added to 0.060 mM HPC-N<sub>12</sub>(Ar<sup>tBu</sup>)<sub>6</sub>. After addition of an equivalent, a spectrum was recorded.

**Emission spectroscopy:** Corrected room temperature emission spectra were collected in the Beckman Institute Laser Resource Center using a modified Jobin Yvon Spec Fluorolog-3 instrument. Samples were excited with a xenon arc lamp, employing a monochromator for wavelength selection, and emission was detected at 90° using two Ocean Optics EQDPro CCD spectrometers spanning 300–930 nm. Single equivalents of metal salt or trifluoromethane sulfonic acid (103 mM) were added to 0.060 mM HPC-N<sub>12</sub>(Ar<sup>tBu</sup>)<sub>6</sub>. After addition of an equivalent, a spectrum was recorded. The entrance and exit slits were 5 nm, and voltage was set to 400 V.

**MALDI-TOF:** Mass spectra were recorded on a Bruker Autoflex MALDI TOF/TOF. Dithranol (0.091 mM in CHCl<sub>3</sub>) was employed as the matrix. 3 μL of the dithranol solution were combined with 1 μL of 0.060 mM HPC-N<sub>12</sub>(Ar<sup>tBu</sup>)<sub>6</sub> + metal salt mixture. This mixture was drop casted onto a MALDI plate and allowed to dry under ambient conditions.

## Synthetic Procedures

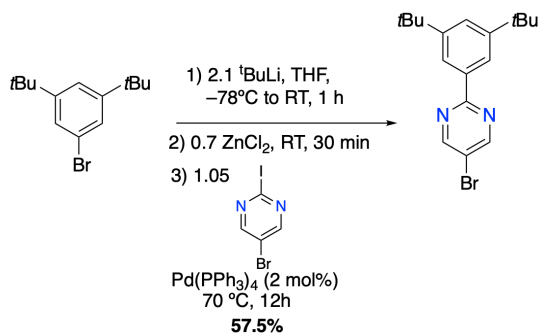

**5-Bromo-2-(3,5-di-*tert*-butylphenyl)pyrimidine (1).** Adapted from a previously-reported procedure:<sup>3</sup> In an  $\text{N}_2$ -purged glove box, a Schlenk flask fitted with a screw-in Teflon stopper was charged with a solution of 3,5-di-*tert*-butylbromobenzene (20 g, 75 mmol) in THF (250 mL). The flask was sealed, brought outside of the box and cooled to  $-78^\circ\text{C}$  with a dry ice/acetone bath. A pentane solution of *tert*-butyllithium (80 mL, 2.0 M, 160 mmol) was added dropwise via cannula. The reaction was allowed to warm to room temperature and stirred for 1 h forming a yellow solution. The reaction was then brought back into an  $\text{N}_2$ -purged glovebox and  $\text{ZnCl}_2$  (7.2 g, 53 mmol) was added slowly to the reaction resulting in the loss of the yellow coloration and formation of a white precipitate. The mixture was allowed to stir at room temperature for 30 min. 5-bromo-2-iodopyrimidine (22.3 g, 78 mmol) was added to the mixture. The flask was then placed in a cold well previously cooled with liquid nitrogen.  $\text{Pd}(\text{PPh}_3)_4$  (1.3 g, 1.0 mmol) was added slowly, the flask sealed, and brought outside of the box. The vessel was fitted with an oven-dried reflux condenser and warmed to  $70^\circ\text{C}$  for 12 h. After cooling to room temperature, water (100 mL) was added to quench the reaction, and the mixture concentrated in vacuo to about 100 mL. The resulting suspension was taken up in  $\text{CH}_2\text{Cl}_2$  (200 mL) and washed with 5 x 100 mL of water. The organic layer was washed with brine (2 x 100 mL), dried over  $\text{MgSO}_4$ , and filtered. Removal of the volatiles under a reduced pressure afforded an orange solid, which was charged with 200 mL of hexanes and heated to reflux. The mixture was filtered, and the filtrate was concentrated under a reduced pressure, allowing a white solid to crash out, which was filtered and washed with cold hexanes. The off-white solid (15.2 g, 57.5% yield) is analytically pure **1a**.  $^1\text{H}$  NMR (400 MHz,  $\text{CDCl}_3$ ):  $\delta$  = 8.84 (s, 2H, ArH), 8.31 (app d, 2H, ArH), 7.62 (t, 1H, ArH), 1.43 (s, 18H,  $\text{C}(\text{CH}_3)_3$ ).  $^{13}\text{C}\{^1\text{H}\}$  NMR (101 MHz,  $\text{CDCl}_3$ )  $\delta$  = 163.75 (aryl-C), 157.84 (aryl-C), 151.40 (aryl-C), 135.93 (aryl-C), 125.6 (aryl-C), 122.65 (aryl-C), 118.05 (aryl-C), 35.18 ( $\text{C}(\text{CH}_3)_3$ ), 31.64 ( $\text{C}(\text{CH}_3)_3$ ). HRMS (FAB+)  $m/z$  Calcd. for  $[\text{M} + \text{H}^+]$   $\text{C}_{18}\text{H}_{13}\text{BrN}_2$  347.1123, found 347.1122.

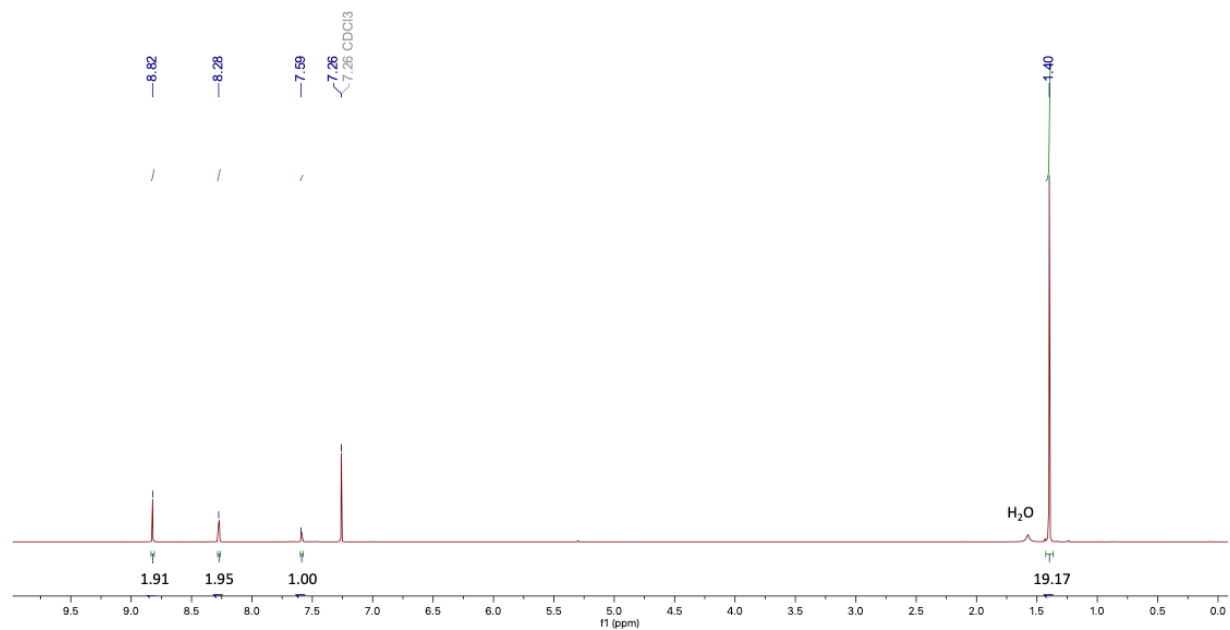

**Figure S1.** <sup>1</sup>H NMR spectrum (400 MHz, CDCl<sub>3</sub>) of 5-bromo-2-(3,5-di-*tert*-butylphenyl)pyrimidine (**1**).

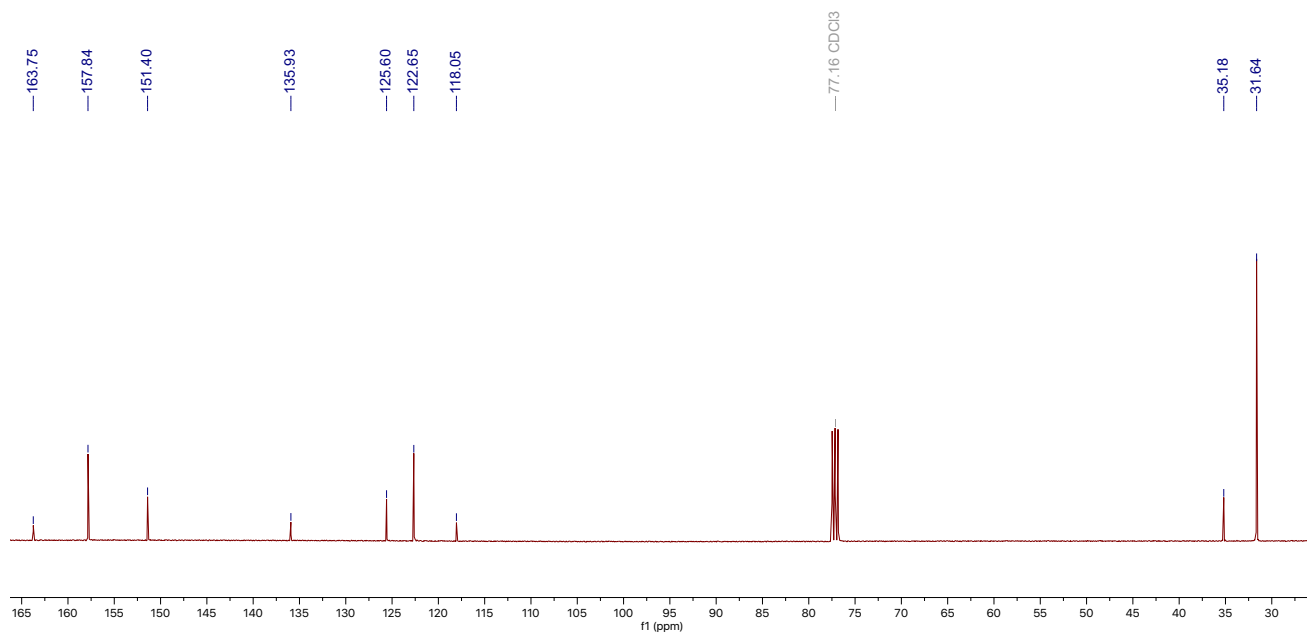

**Figure S2.** <sup>13</sup>C{<sup>1</sup>H} NMR spectrum (101 MHz, CDCl<sub>3</sub>) of 5-bromo-2-(3,5-di-*tert*-butylphenyl)pyrimidine (**1**).



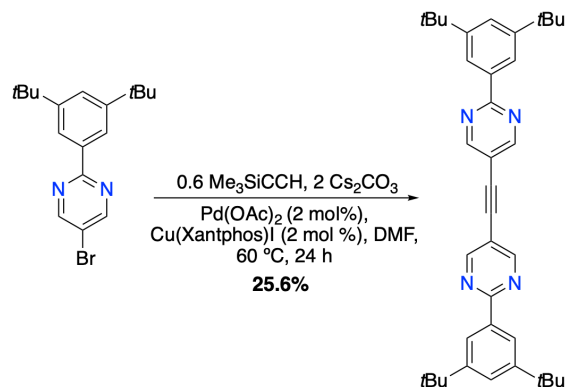

**1,2-bis(2-(3,5-di-*tert*-butylphenyl)pyrimidin-5-yl)ethyne (**2**).** Adapted from a previously-reported procedure:<sup>4</sup> A 1-L, oven-dried Schlenk flask was allowed to cool under vacuum on the Schlenk line. Under a positive pressure of N<sub>2</sub>, the Schlenk flask was charged with 5-bromo-2-(3,5-di-*tert*-butylphenyl)pyrimidine (**1a**) (12.8 g, 37 mmol), cesium carbonate (24.1 g, 74 mmol), and palladium (II) acetate (165 mg, 0.73 mmol). DMF (250 mL) was added to the Schlenk flask via cannula. To this mixture was added trimethylsilylacetylene (3.14 mL, 22 mmol) under positive N<sub>2</sub> pressure. The reaction mixture was degassed via one cycle of freeze-pump-thaw. Iodo[bis(diphenylphosphino)-9,9-dimethylxanthene]copper(I) (566 mg, 0.73 mmol) was added under positive N<sub>2</sub> pressure. The reaction mixture was subjected to two more cycles of freeze-pump-thaw, and the mixture was heated to 60 °C for 12 h. Volatiles were removed under a reduced pressure, and the crude solid was charged with CH<sub>2</sub>Cl<sub>2</sub> (300 mL) and filtered to remove excess cesium carbonate. The filtrate was concentrated under a reduced pressure and purified via column chromatography with CH<sub>2</sub>Cl<sub>2</sub> as the eluent. The white solid (5.3 g, 25.6%) was dried under vacuum for 12 h at room temperature prior to the next step. <sup>1</sup>H NMR (400 MHz, CDCl<sub>3</sub>) δ = 8.95 (s, 4H, ArH), 8.36 (app d, 4H, ArH), 7.61 (t, 2H, ArH), 1.42 (s, 36H, C(CH<sub>3</sub>)<sub>3</sub>). <sup>13</sup>C {<sup>1</sup>H} NMR (101 MHz, CDCl<sub>3</sub>) δ = 164.02 (aryl-C), 159.13 (aryl-C), 151.45 (aryl-C), 136.22 (aryl-C), 125.93 (aryl-C), 123.02 (aryl-C), 115.89 (aryl-C), 90.03 (alkyne-CC), 35.22 (C(CH<sub>3</sub>)<sub>3</sub>) 31.65 (C(CH<sub>3</sub>)<sub>3</sub>). HRMS (FAB<sup>+</sup>) m/z Calcd. for [M + H<sup>+</sup>] C<sub>38</sub>H<sub>47</sub>N<sub>4</sub> 559.3801, found 559.3813.

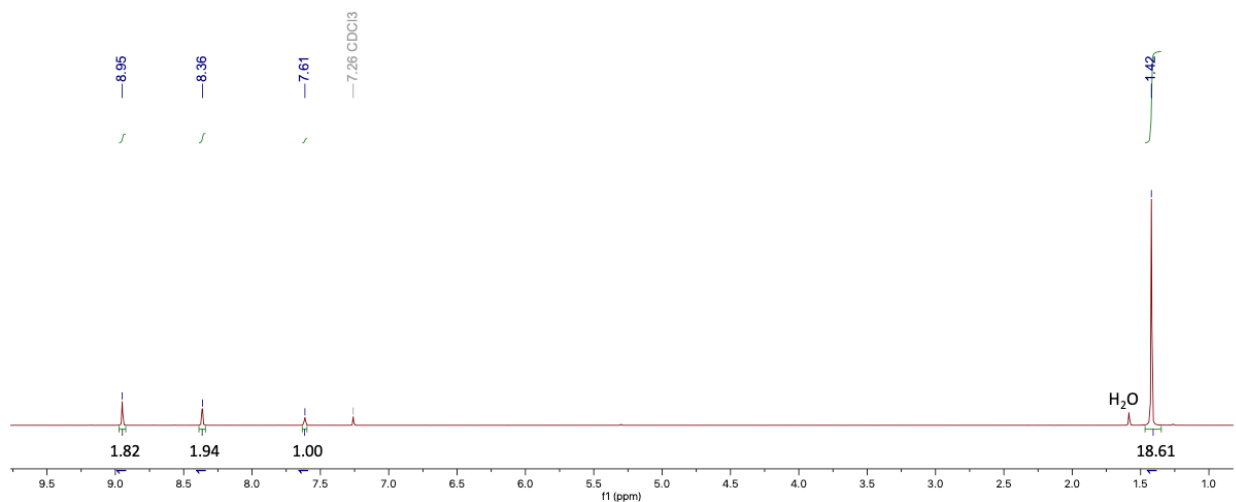

**Figure S3.** <sup>1</sup>H NMR spectrum (400 MHz, CDCl<sub>3</sub>) of 1,2-bis(2-(3,5-di-*tert*-butylphenyl)pyrimidin-5-yl)ethyne (**2**).

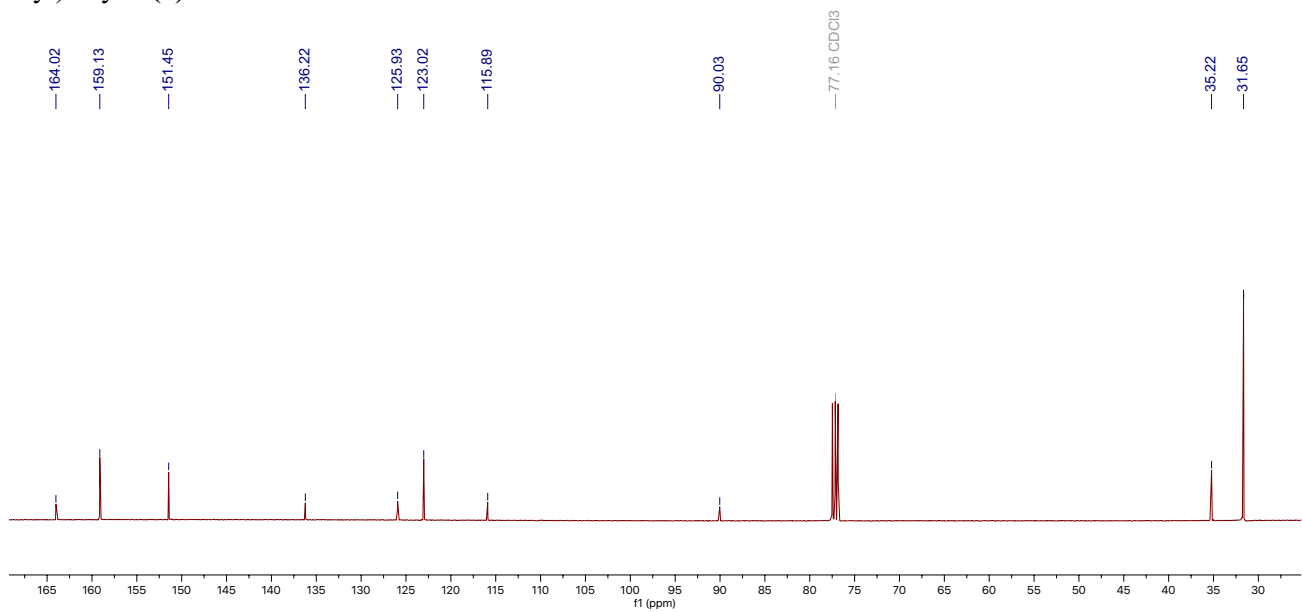

**Figure S4.** <sup>13</sup>C{<sup>1</sup>H} NMR spectrum (101 MHz, CDCl<sub>3</sub>) of 1,2-bis(2-(3,5-di-*tert*-butylphenyl)pyrimidin-5-yl)ethyne (**2**).

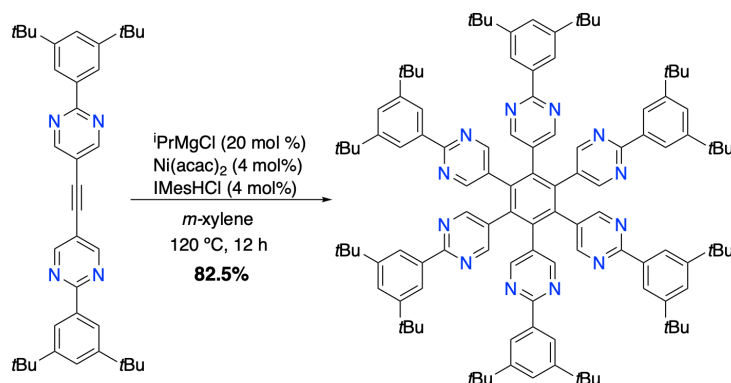

**1,2,3,4,5,6-hexakis(2-(3,5-di-*tert*-butylphenyl)pyrimidin-5-yl)benzene (3).** Adapted from a previously-reported procedure:<sup>5</sup> An oven-dried Schlenk tube fitted with a screw-in Teflon stopper was charged with 1,2-bis(2-(3,5-di-*tert*-butylphenyl)pyrimidin-5-yl)ethyne (**2**) (2.00 g, 4 mmol), IMesHCl (54 mg, 0.16 mmol), and acetylacetonatonickel (II) (41 mg, 0.16 mmol). The flask was then charged with 10 mL of *m*-xylene via syringe. The solution was subjected to three cycles of freeze-pump-thaw and left under nitrogen. Isopropylmagnesium chloride (0.5 mL, 1.39 M in THF, 0.7 mmol) was added via syringe, and the solution was warmed to 120 °C for 16 h. Volatiles were removed under a reduced pressure. The crude solid was purified via column chromatography (10% EtOAc/Hexanes), and the fractions containing the desired product precipitated a white solid, which was filtered and washed with ethyl acetate and hexanes to yield the desired cyclotrimer **3a** (1.65 g, 82.5%). <sup>1</sup>H NMR (400 MHz, CDCl<sub>3</sub>)  $\delta$  = 8.49 (s, 2H, *ArH*), 8.09 (s, 2H, *ArH*), 7.47 (s, 1H, *ArH*), 1.28 (s, 18H, C(CH<sub>3</sub>)<sub>3</sub>). <sup>13</sup>C{<sup>1</sup>H} NMR (101 MHz, CDCl<sub>3</sub>)  $\delta$  = 164.15 (aryl-C), 157.82 (aryl-C), 151.25 (aryl-C), 138.07 (aryl-C), 135.64 (aryl-C), 128.94 (aryl-C), 125.91 (aryl-C), 122.81 (aryl-C), 34.82 (C(CH<sub>3</sub>)<sub>3</sub>), 31.53 (C(CH<sub>3</sub>)<sub>3</sub>). Anal. calcd. (%) for C<sub>114</sub>H<sub>138</sub>N<sub>12</sub>: C, 81.68; H, 8.30; N, 10.03. Found: C, 80.99; H, 8.14; N, 9.89.

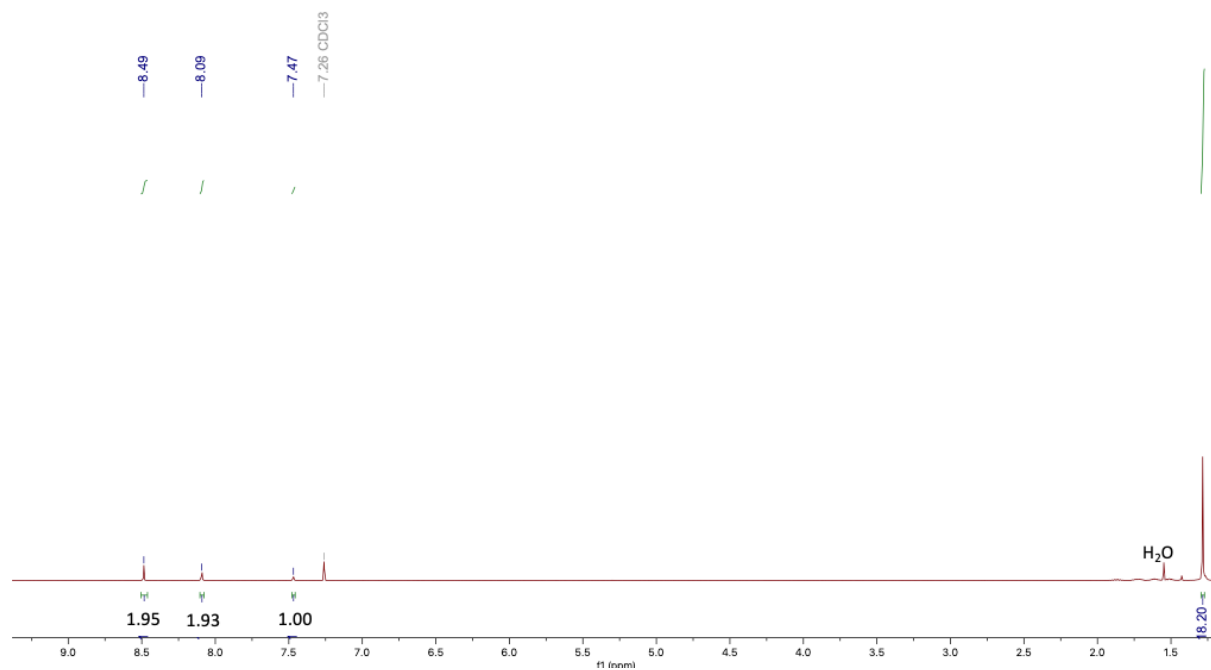

**Figure S5.** <sup>1</sup>H NMR spectrum (400 MHz, CDCl<sub>3</sub>) of 1,2,3,4,5,6-hexakis(2-(3,5-di-*tert*-butylphenyl)pyrimidin-5-yl)benzene (**3**).

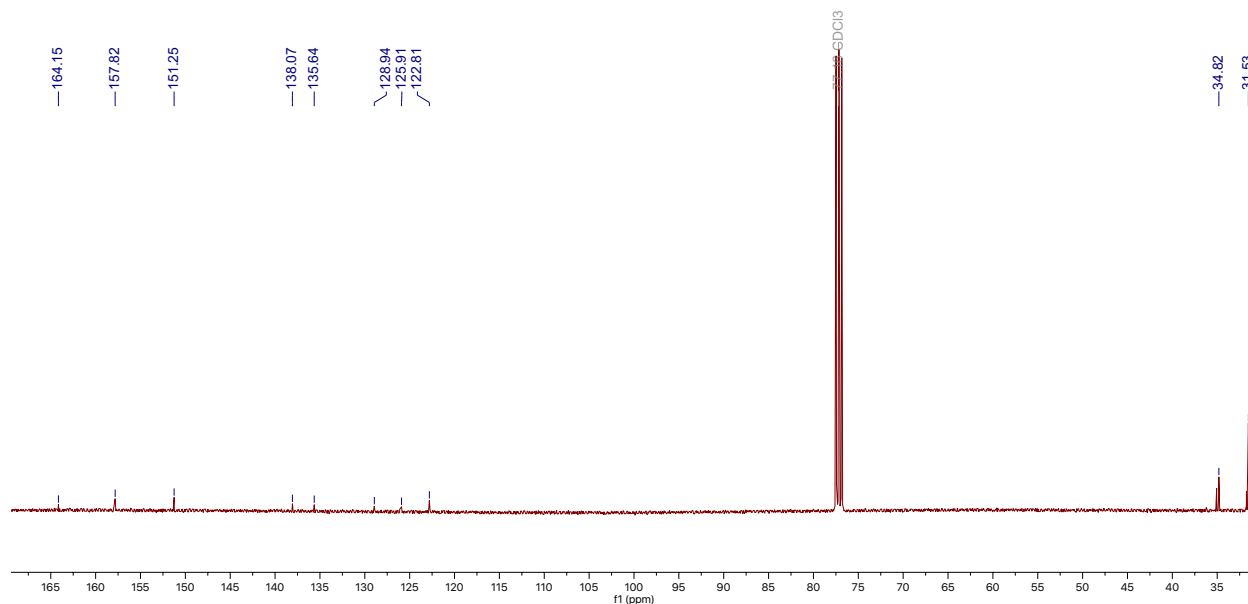

**Figure S6.** <sup>13</sup>C{<sup>1</sup>H} NMR spectrum (101 MHz, CDCl<sub>3</sub>) of 1,2,3,4,5,6-hexakis(2-(3,5-di-*tert*-butylphenyl)pyrimidin-5-yl)benzene (**3**).

**Monitoring the ring closure of 3a and 3b.** In an N<sub>2</sub>-purged glovebox, a 1-2 mL aliquot was removed from the reduction of **3** and quenched slowly with isopropanol on the benchtop. This mixture was then charged with a minimal amount of DDQ to oxidize the putative anionic intermediate,<sup>6</sup> resulting in a red-yellow solution. The volatiles were removed on the rotary evaporator, and the crude solid was taken up in CDCl<sub>3</sub> and filtered to record the <sup>1</sup>H NMR spectrum.

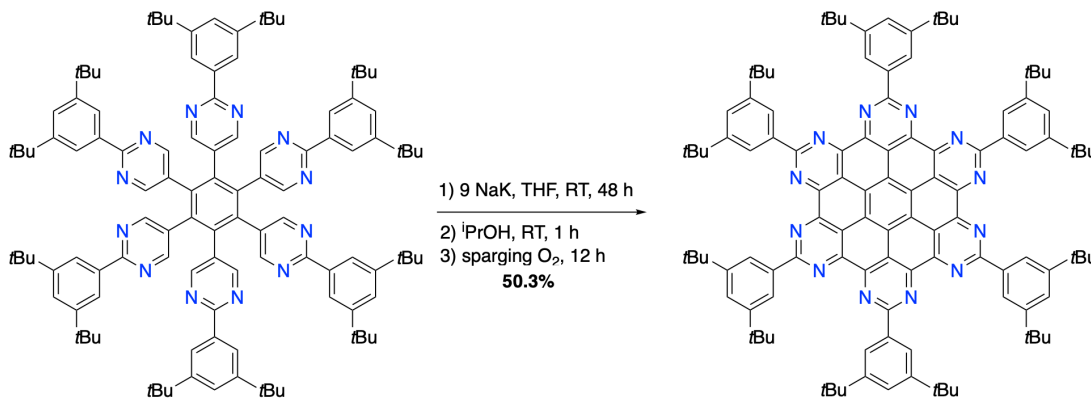

**HPC-N<sub>12</sub>(Ar<sup>tBu</sup>)<sub>6</sub>.** In an N<sub>2</sub>-purged glovebox, a 20-mL scintillation vial is charged with 1,2,3,4,5,6-hexakis(2-(3,5-di-*tert*-butylphenyl)pyrimidin-5-yl)benzene (200 mg, 0.12 mmol). In a separate vial, sodium (24.7 mg, 1.07 mmol) and potassium (42 mg, 1.07 mmol) are weighed out and carefully mixed with a spatula. The alloy is suspended in THF and charged with a magnetic pre-reduced stir bar. Compound **3** is suspended in THF and added to the sodium and potassium alloy to immediately form a purple suspension. This mixture is stirred at room temperature for 48 h. The dark brown solution is transferred to a Teflon-sealed Schlenk tube and quenched with isopropanol, followed by MeOH over 1 h to form a dark yellow mixture. This solution is then sparged with dioxygen for 12 h, concentrated under a reduced pressure, and extracted with chloroform and filtered. The filtrate is allowed to sit at -20 °C for 7 h to form deep-red crystals. The mother liquor is decanted, and the crystals are rinsed with cold chloroform. **HPC-N<sub>12</sub>(Ar<sup>tBu</sup>)<sub>6</sub>** is then dried in vacuo at room temperature for 12 h before further use (100.4 mg, 50.3%). Single crystals suitable for X-ray diffraction were grown from slow evaporation at room temperature of a saturated chloroform solution. <sup>1</sup>H NMR (400 MHz, CDCl<sub>3</sub>) δ = 9.25 (br s, 2H, ArH), 7.83 (s, 1H, ArH), 1.65 (s, 18H, C(CH<sub>3</sub>)<sub>3</sub>). <sup>13</sup>C {<sup>1</sup>H} NMR (101 MHz, CDCl<sub>3</sub>) δ = 153.82 (aryl-C), 150.40 (aryl-C), 136.74 (aryl-C), 124.85 (aryl-C), 123.48 (aryl-C), 119.67 (aryl-C), 116.22 (aryl-C), 115.35 (aryl-C), 34.27 (C(CH<sub>3</sub>)<sub>3</sub>), 31.04 (C(CH<sub>3</sub>)<sub>3</sub>). Anal. calcd. (%) for C<sub>114</sub>H<sub>126</sub>N<sub>12</sub>: C, 82.27; H, 7.63; N, 10.10. Found: C, 82.00; H, 7.43; N, 9.90.

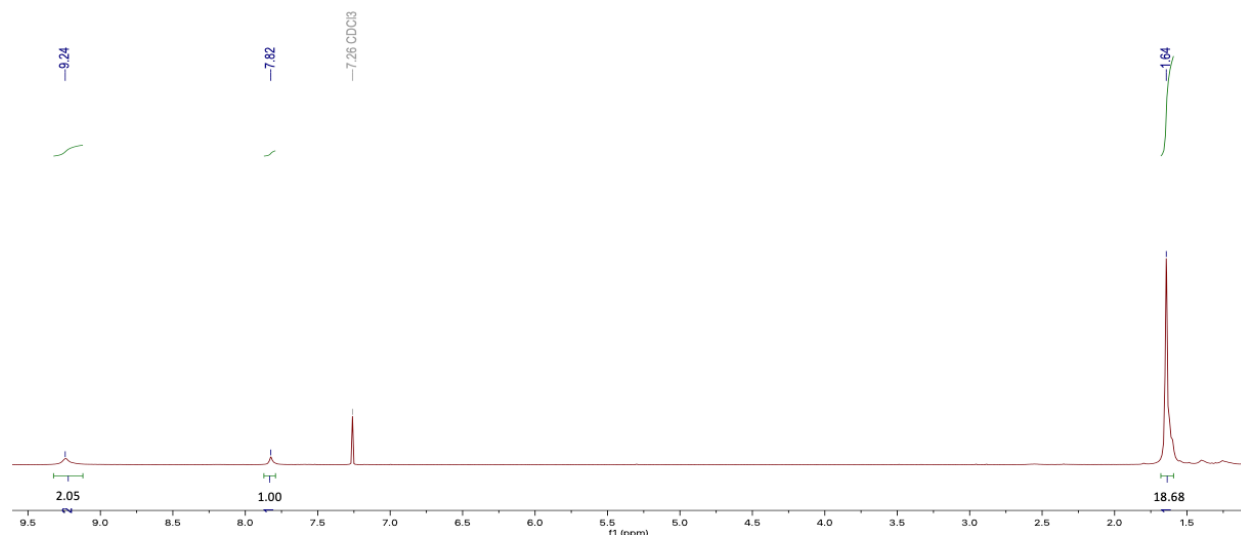

**Figure S7.**  $^1\text{H}$  NMR spectrum (400 MHz,  $\text{CDCl}_3$ ) of  $\text{HPC-N}_{12}(\text{Ar}^{\text{tBu}})_6$ .

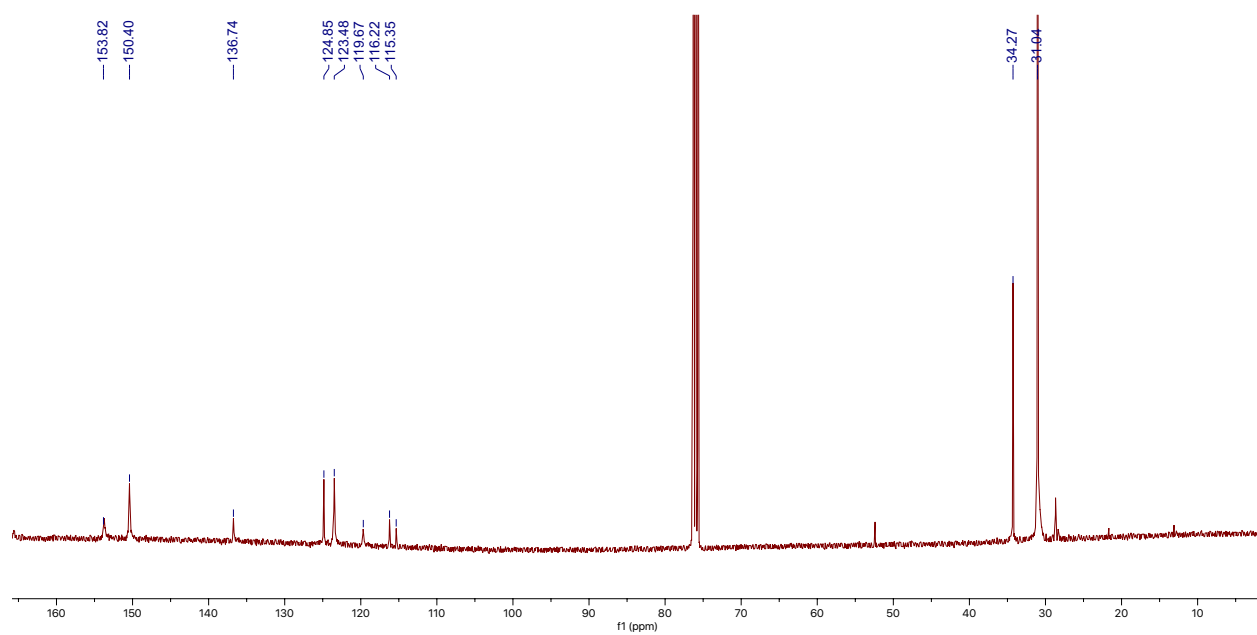

**Figure S8.**  $^{13}\text{C}\{^1\text{H}\}$  NMR spectrum (101 MHz,  $\text{CDCl}_3$ ) of  $\text{HPC-N}_{12}(\text{Ar}^{\text{tBu}})_6$ .

## Additional Spectroscopy and Electrochemistry Data

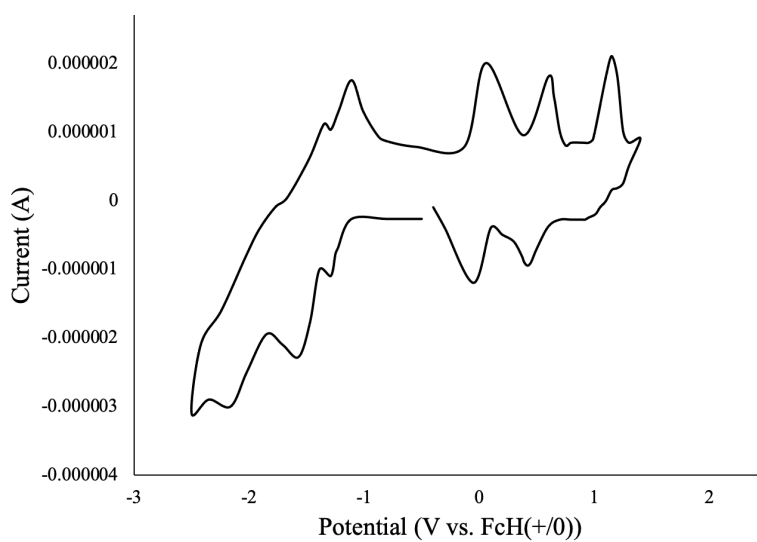

**Figure S9.** CV of  $\text{HPC-N}_{12}(\text{Ar}^{\text{tBu}})_6$  (1 mM) collected at 200 mV/s. 0.1 M  $(^{\text{t}}\text{Bu})_4\text{NPF}_6$  in THF. Working electrode: glassy carbon. Reference electrode: Ag/AgCl. Counter electrode: Pt wire.

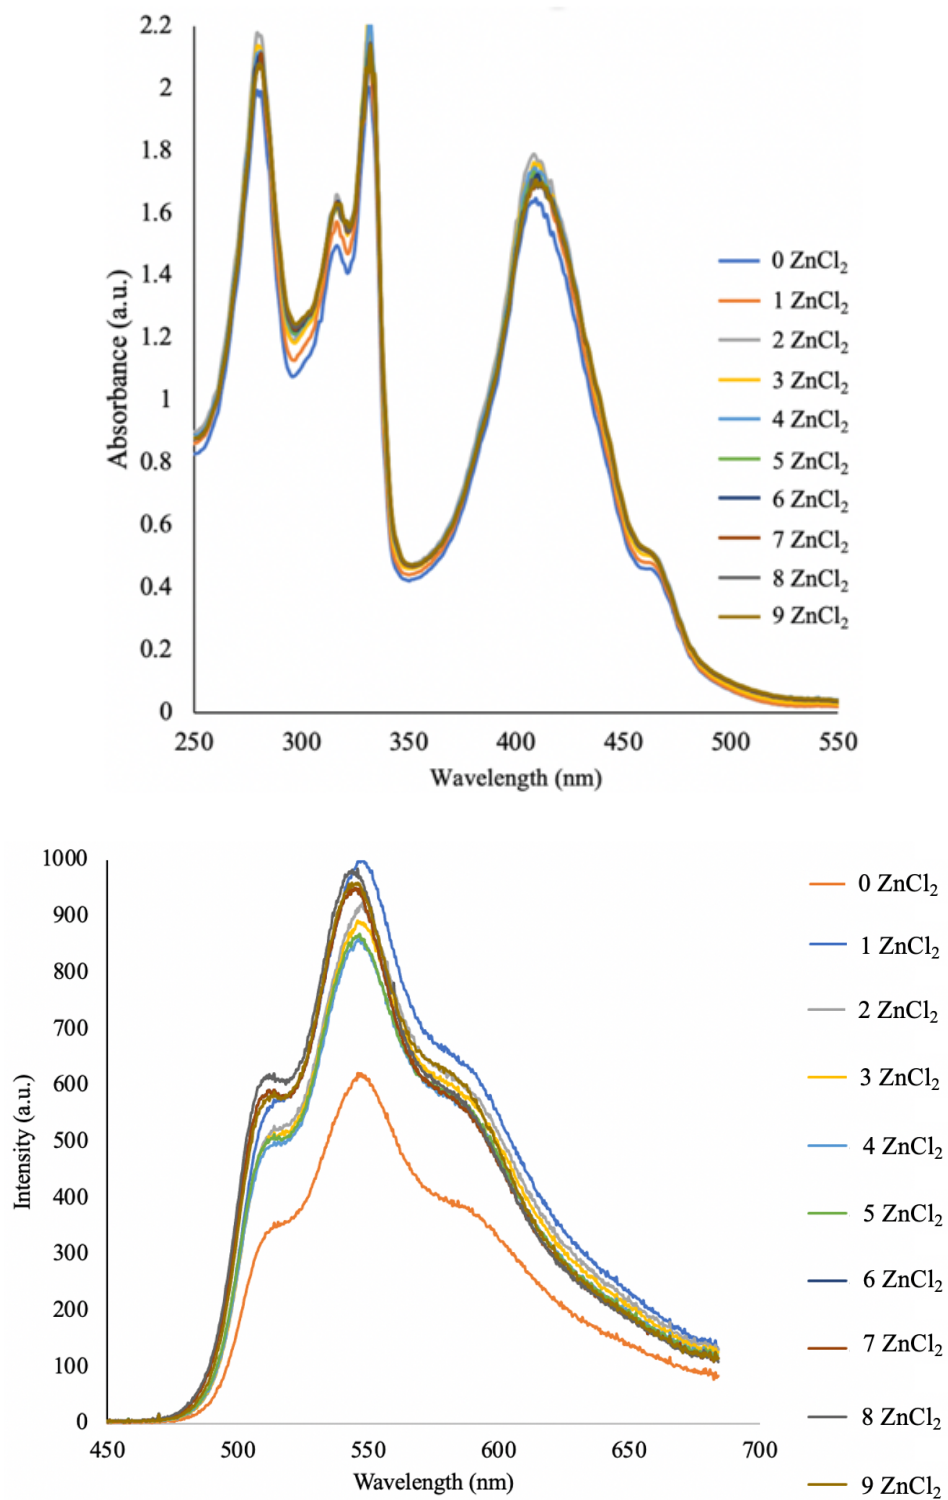

**Figure S10.** A. Absorption spectra of HPC-N<sub>12</sub>(Ar<sup>tBu</sup>)<sub>6</sub> (0.060 mM in CHCl<sub>3</sub>). B. Emission spectra (excitation wavelength: 410 nm) of HPC-N<sub>12</sub>(Ar<sup>tBu</sup>)<sub>6</sub> recorded after adding successive equivalents of ZnCl<sub>2</sub>.



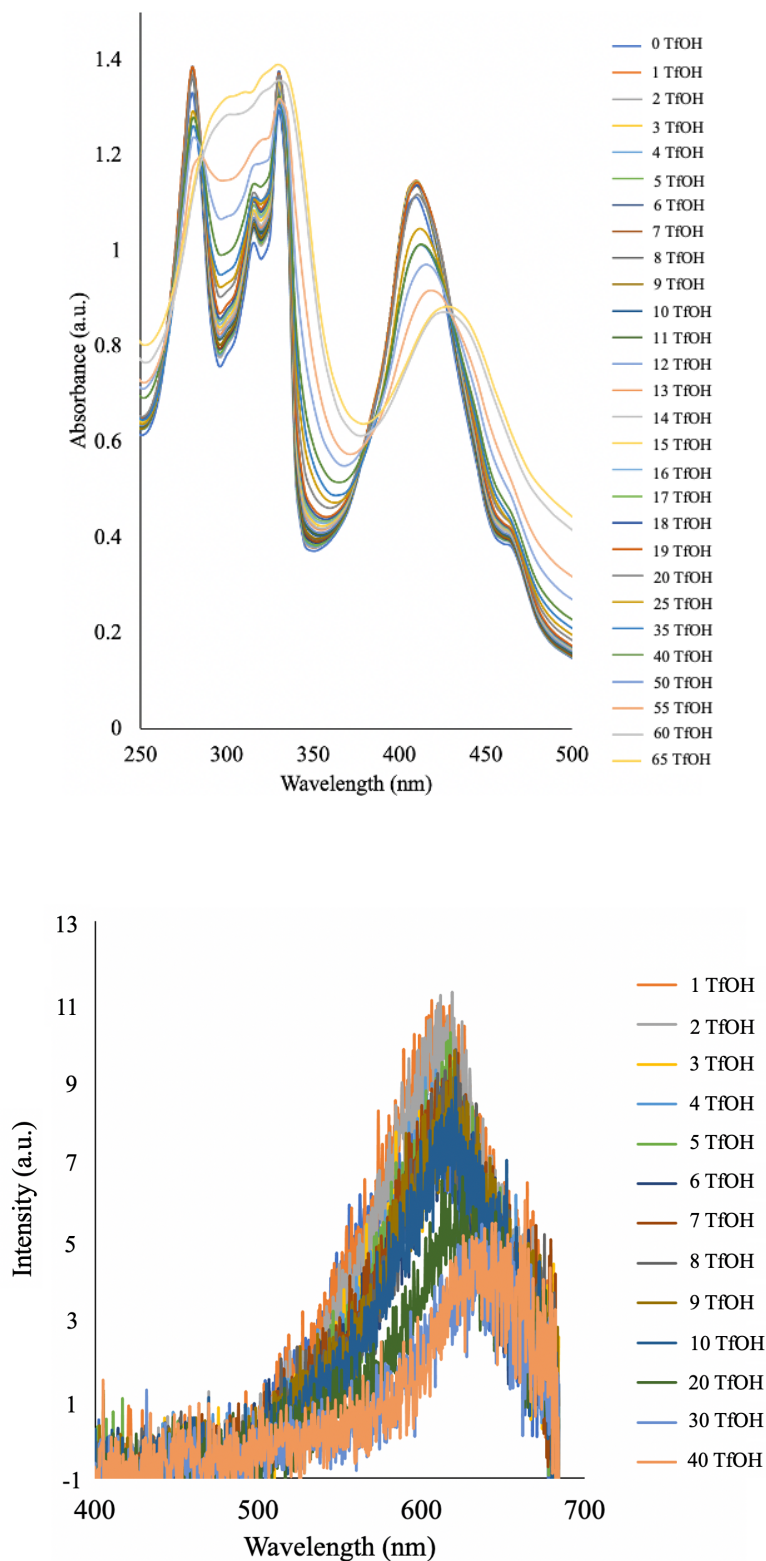

**Figure S11.** A. Absorption spectra of HPC-N<sub>12</sub>(Ar<sup>tBu</sup>)<sub>6</sub> (0.060 mM in CHCl<sub>3</sub>). B. Emission spectra (excitation wavelength: 410 nm) of HPC-N<sub>12</sub>(Ar<sup>tBu</sup>)<sub>6</sub> recorded after adding successive equivalents of TfOH (100 mM in CHCl<sub>3</sub>).

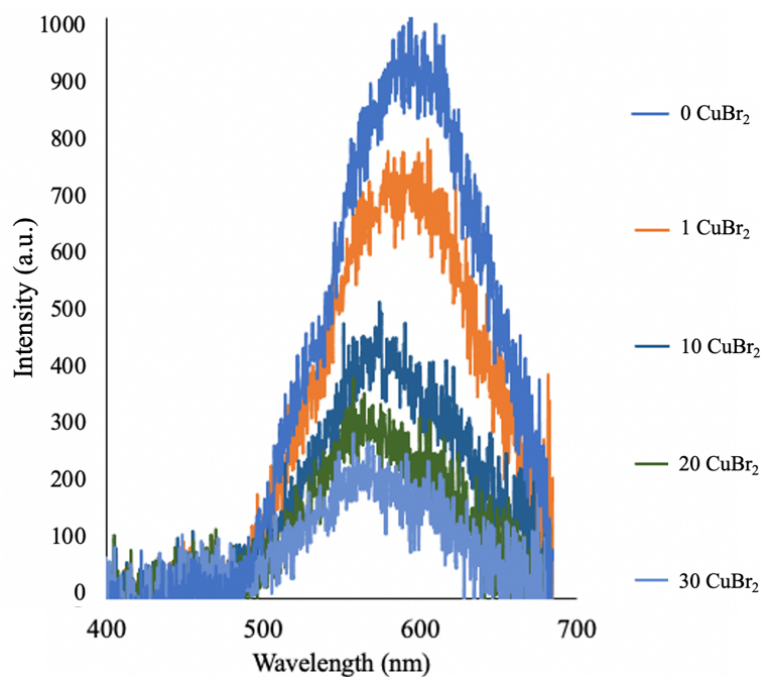

**Figure S12.** Emission spectra (excitation wavelength: 410 nm) of  $\text{HPC-N}_{12}(\text{Ar}^{\text{tBu}})_6$  (0.060 mM in THF) recorded after adding successive equivalents of  $\text{CuBr}_2$ .

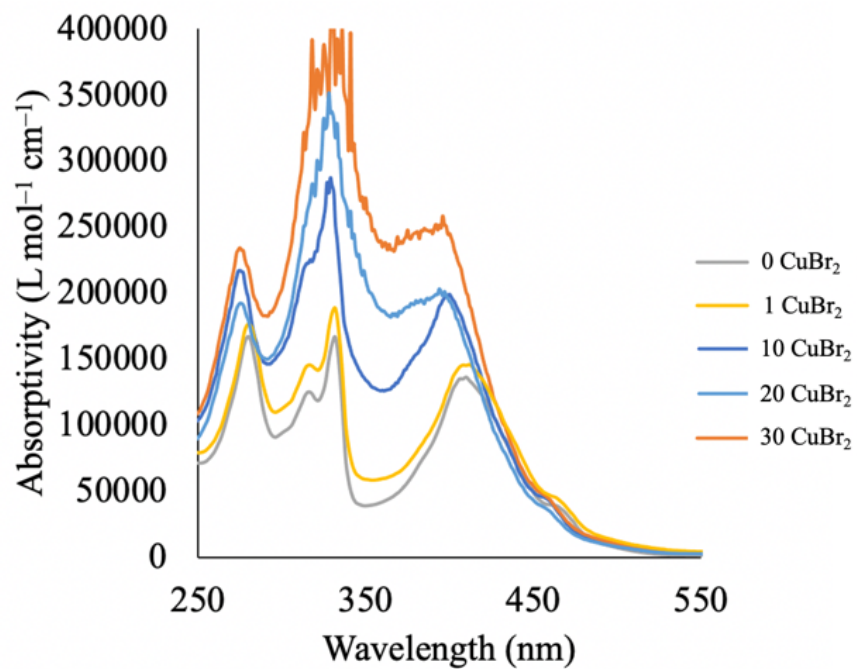

**Figure S13.** Absorption spectra of  $\text{HPC-N}_{12}(\text{Ar}^{\text{tBu}})_6$  (0.060 mM in THF) recorded after adding successive equivalents of  $\text{CuBr}_2$ .

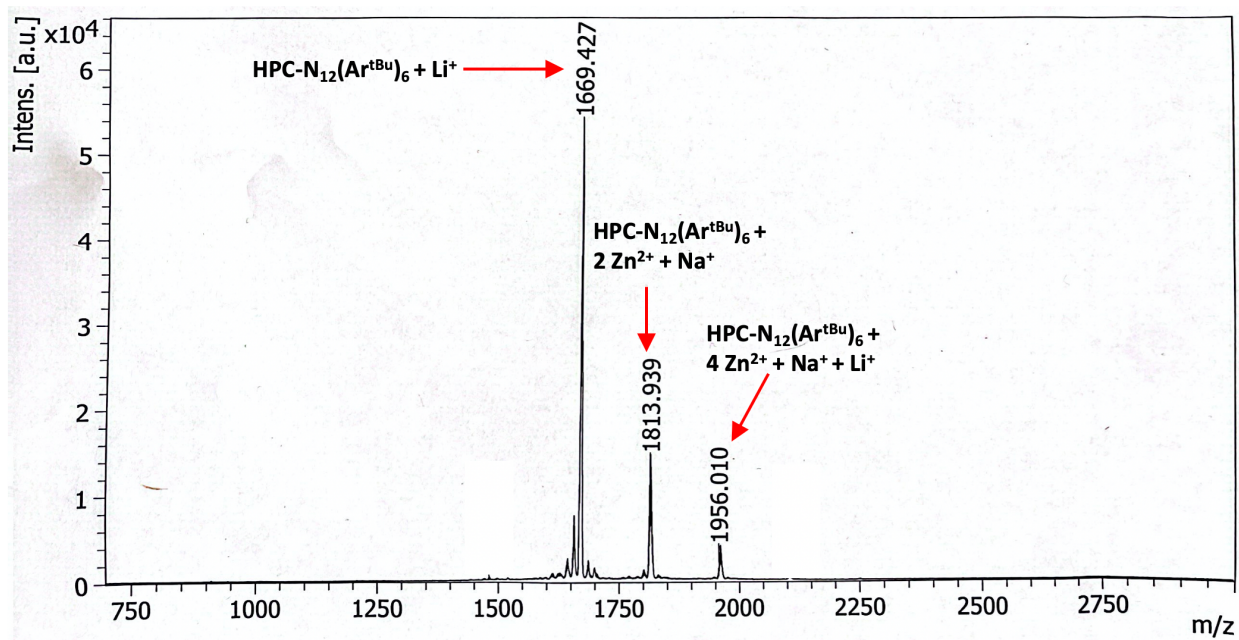

Figure S14. MALDI-TOF of 20 ZnCl<sub>2</sub> added to HPC-N<sub>12</sub>(Ar<sup>tBu</sup>)<sub>6</sub> in CHCl<sub>3</sub>. Matrix: dithranol

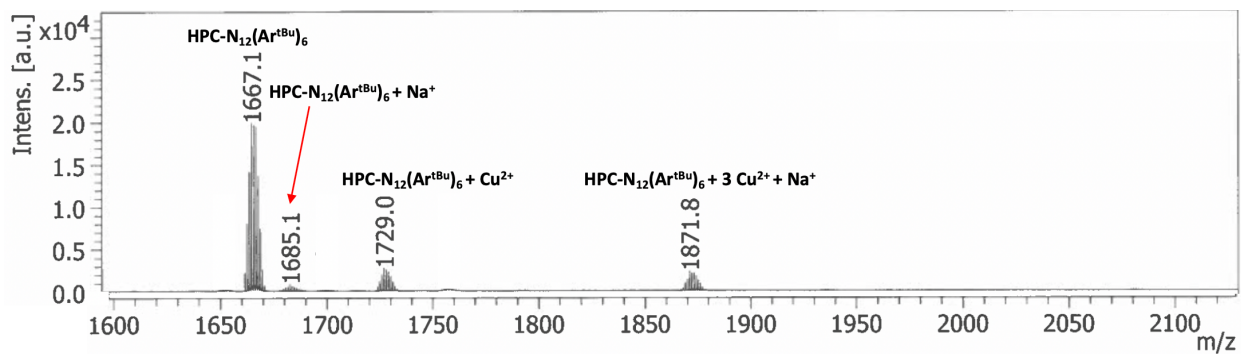

Figure S15. MALDI-TOF of 20 CuBr<sub>2</sub> added to HPC-N<sub>12</sub>(Ar<sup>tBu</sup>)<sub>6</sub> in THF Matrix: dithranol

**Table S1. Comparing most positive reduction determined by cyclic voltammetry between hexabenzocoronene variants.**

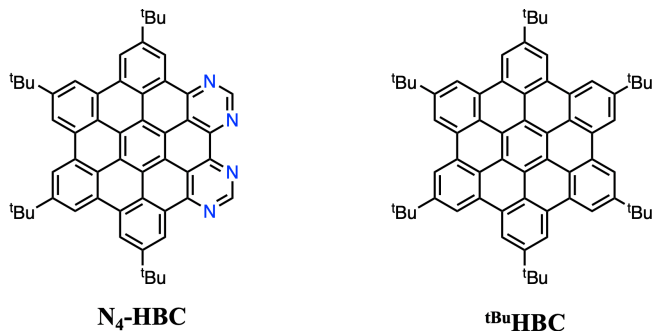

| Compound                                                | $E_{1/2}$ (V vs. FcH <sup>0/+</sup> ) | Electrolyte                                                                              | Reference                               |
|---------------------------------------------------------|---------------------------------------|------------------------------------------------------------------------------------------|-----------------------------------------|
| <b>HPC-N<sub>12</sub>(Ar<sup>tBu</sup>)<sub>6</sub></b> | -1.31                                 | 0.1 M<br><sup>n</sup> (Bu) <sub>4</sub> PF <sub>6</sub> /THF                             | <i>This work</i>                        |
| <b>N<sub>4</sub>-HBC</b>                                | -1.6                                  | 0.1 M<br><sup>n</sup> (Bu) <sub>4</sub> PF <sub>6</sub> /CH <sub>3</sub> CN              | Draper and co-workers <sup>7</sup>      |
| <b>t<sup>Bu</sup>HBC</b>                                | -2.1                                  | 0.1 M<br><sup>n</sup> (Bu) <sub>4</sub> PF <sub>6</sub> /THF                             | Müllen and co-workers <sup>8</sup>      |
| <b>t<sup>Bu</sup>HBC</b>                                | -1.7                                  | 0.1 M<br><sup>n</sup> (Bu) <sub>4</sub> PF <sub>6</sub> /CH <sub>2</sub> Cl <sub>2</sub> | Guldi, Jux, and co-workers <sup>9</sup> |

## Density Functional Theory (DFT) Calculations

All computations were performed using ORCA software<sup>10</sup> version 4.1.2 on the Resnick High-Performance Computing Cluster at Caltech. Geometry optimizations and orbital energies were performed using the restricted Kohn-Sham formalism with the B3LYP functional<sup>11</sup> and the 6-311G(d,p) basis set.<sup>12</sup>

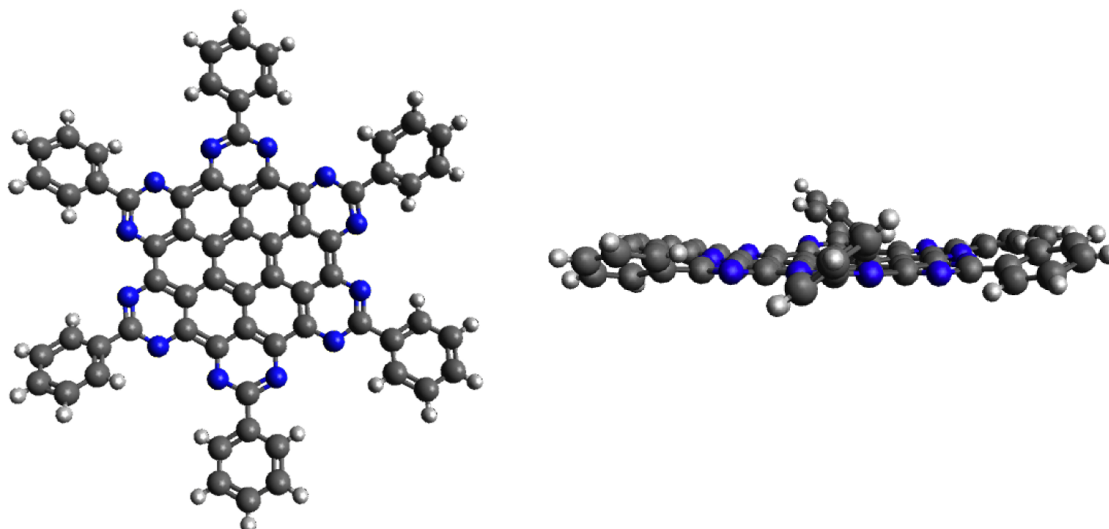

**Figure S16.** Geometry-optimized structure of **HPC-N<sub>12</sub>Ph<sub>6</sub>**. Right: rotated by 90° into the page.

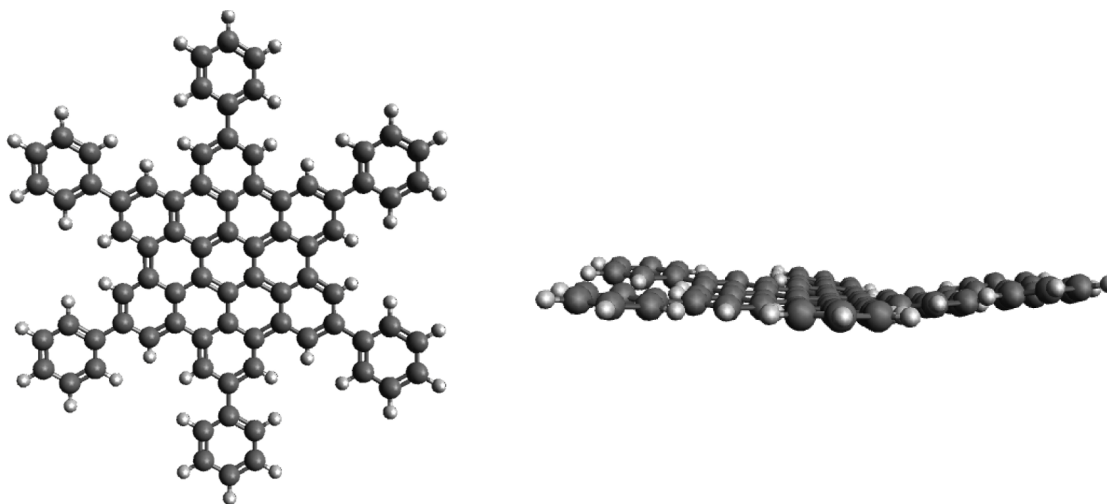

**Figure S17.** Geometry-optimized structure of **HBC-Ph<sub>6</sub>**. Right: rotated by 90° into the page.

**HPC-N<sub>12</sub>Ph<sub>6</sub>** was modeled using Avogadro software starting from the crystal structure of **HPC-N<sub>12</sub>(Ar<sup>tBu</sup>)<sub>6</sub>** and submitted for geometry optimization. The structure of **HBC-Ph<sub>6</sub>** was generated by replacing each nitrogen atom with C—H. In the optimized structure, the phenyl rings are essentially coplanar with the HBC (Figure S17). When **HBC-Ph<sub>6</sub>** is modified such that each Ph rings are rotated relative to the HBC plane for a dihedral angle of 45°, the rings show little rotation upon geometry optimization. The HOMO-LUMO gap changes (increases from 3.347 eV to 3.576 eV), but remains greater than that of **HPC-N<sub>12</sub>Ph<sub>6</sub>**. At this level of theory, these results indicate that the HOMO-LUMO gap is influenced by a combination of nitrogen incorporation and aryl substituent presence / orientation in the periphery of the polyaromatic system.

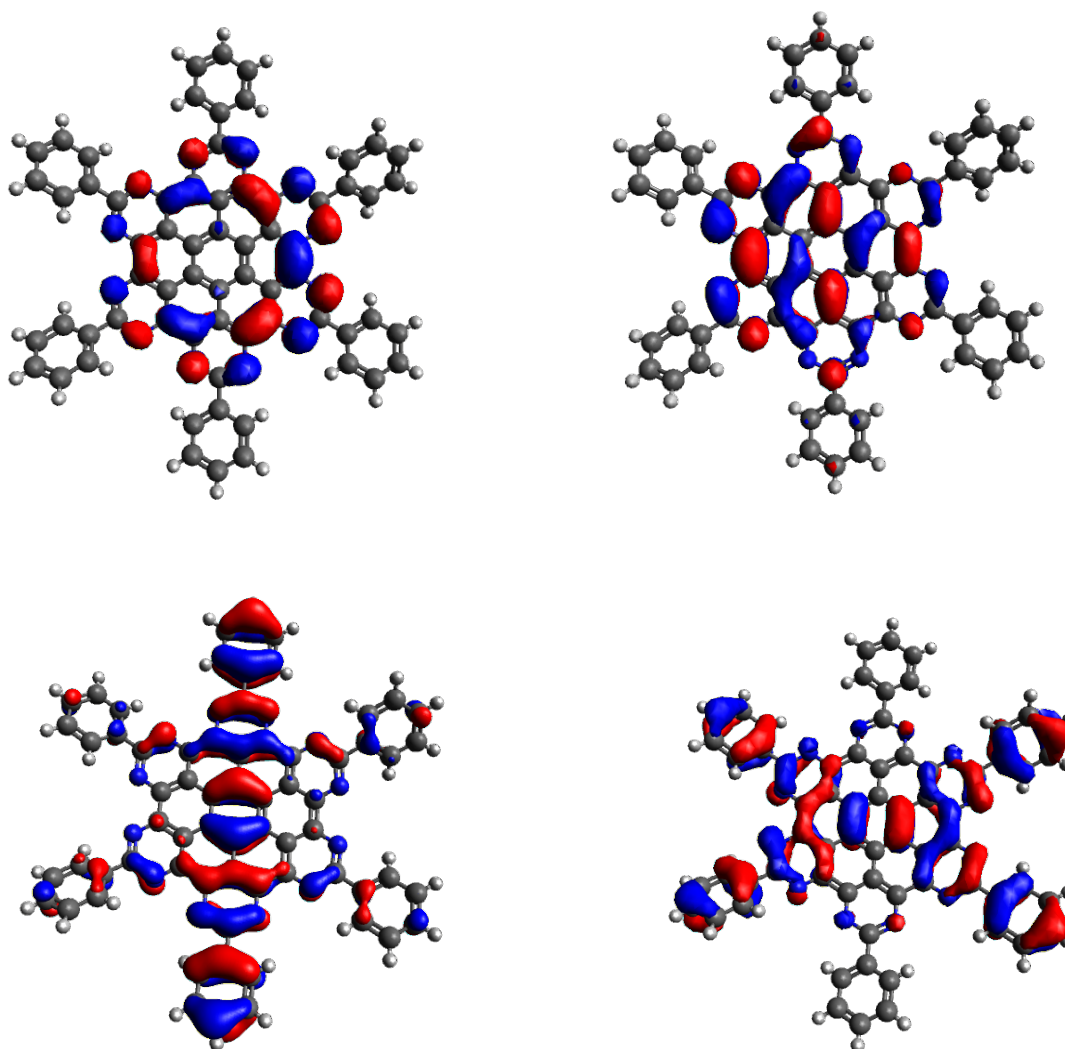

**Figure S18.** Clockwise from top left: LUMO ( $-3.250$  eV), LUMO+1 ( $-3.190$  eV), HOMO-1 ( $-6.296$  eV), and HOMO ( $-6.269$  eV) of  $\text{HPC-N}_{12}\text{Ph}_6$ . Isosurfaces are shown at 0.02 value.



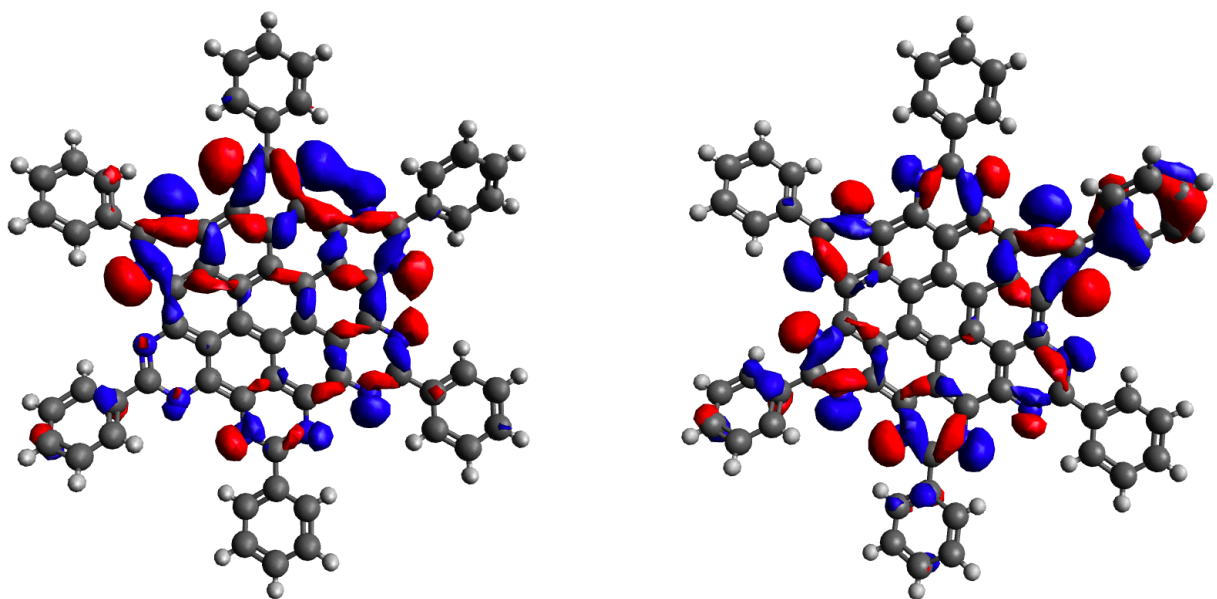

**Figure S19.** (left) HOMO-6 and (right) HOMO-2 for **HPC-N<sub>12</sub>Ph<sub>6</sub>**. Isovalues set to 0.02.

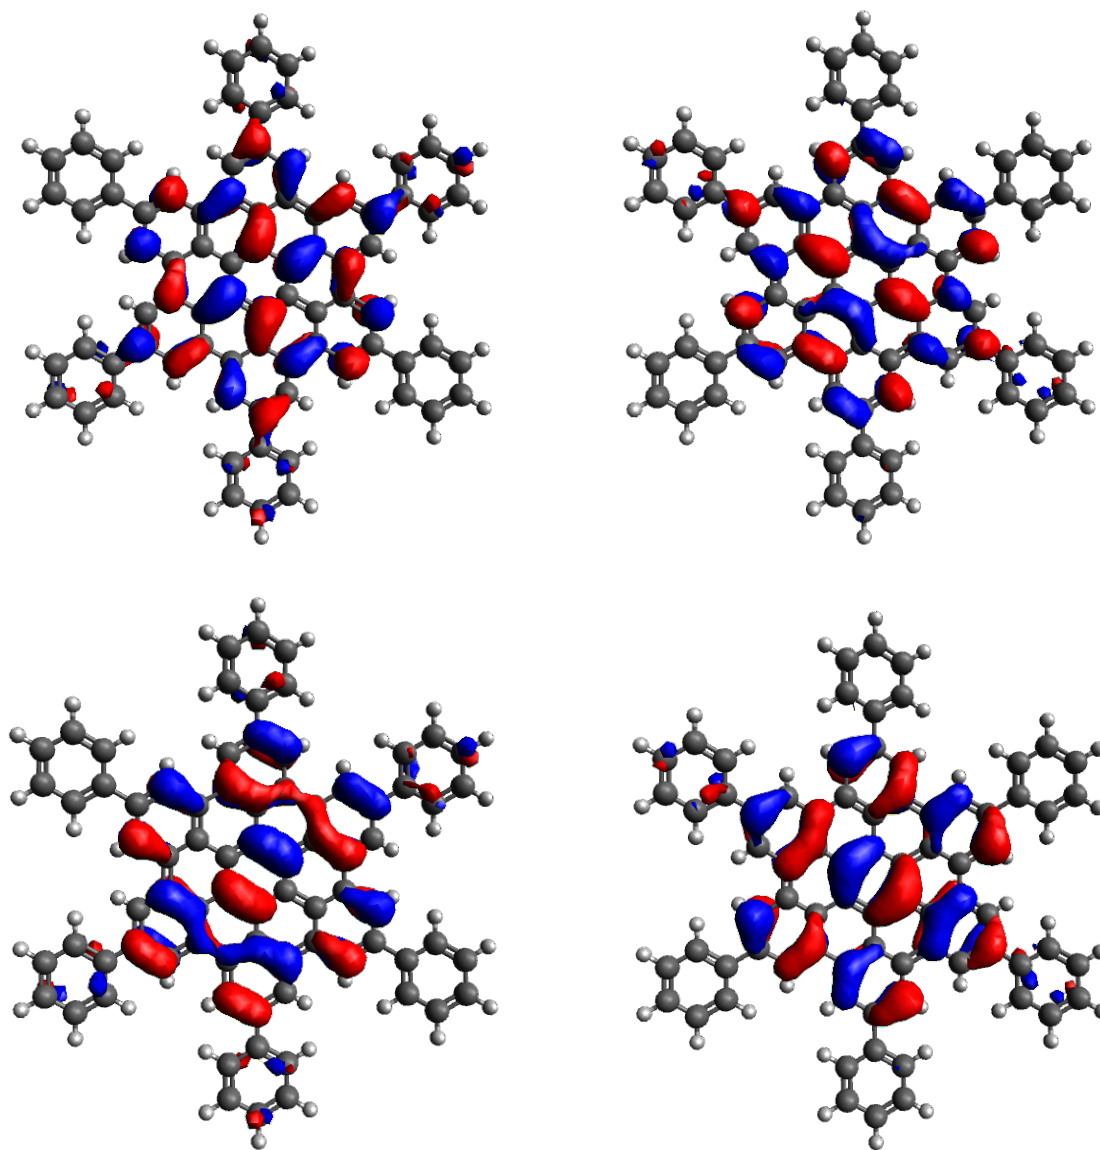

**Figure S20.** Clockwise from top left: LUMO (−1.983 eV), LUMO+1 (−1.953 eV), HOMO-1 (−5.350 eV), and HOMO (−5.330 eV) of **HBC-Ph<sub>6</sub>**. Isosurfaces are shown at 0.02 value.



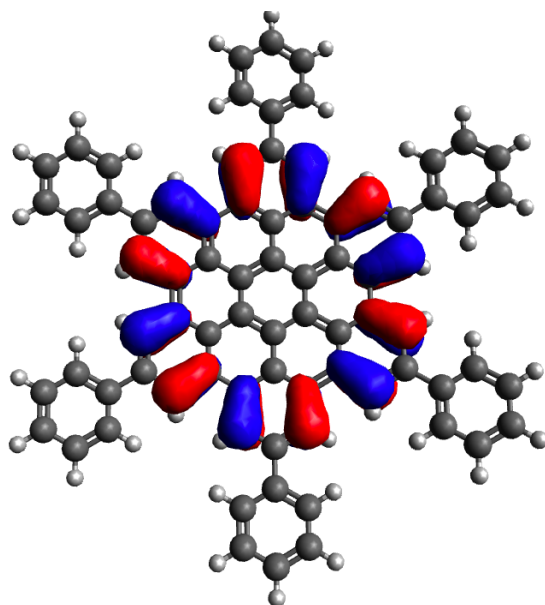

**Figure S21.** HOMO-2 for **HBC-Ph<sub>6</sub>**. Isovalue set to 0.02.

**Table S2.** HOMO-LUMO energy differences (eV) (computed from B3LYP/6-311G(d,p)).

|                                         |       |
|-----------------------------------------|-------|
| <b>HBC</b>                              | 3.568 |
| <b>HBC-Ph<sub>6</sub></b>               | 3.347 |
| <b>HPC-N<sub>12</sub></b>               | 3.635 |
| <b>HPC-N<sub>12</sub>Ph<sub>6</sub></b> | 3.019 |

**Table S3.** Cartesian coordinates obtained for the optimized geometry of **HPC-N<sub>12</sub>**.

|   |           |          |           |
|---|-----------|----------|-----------|
| N | 10.210694 | 1.114678 | 9.574955  |
| N | 4.182042  | 8.128486 | 13.773238 |
| N | 8.907951  | 3.602846 | 16.345539 |
| N | 10.726567 | 1.035419 | 12.359151 |
| N | 3.665661  | 8.207244 | 10.989105 |
| N | 5.484301  | 5.639819 | 7.002708  |
| N | 4.095899  | 7.384091 | 8.750411  |
| N | 5.377297  | 7.188247 | 15.660537 |
| N | 9.015201  | 2.054679 | 7.687723  |
| N | 7.282290  | 5.365938 | 16.696740 |
| N | 10.296512 | 1.858772 | 14.597805 |
| N | 7.110462  | 3.877184 | 6.651460  |
| C | 9.554088  | 1.939529 | 10.408885 |
| C | 5.282938  | 6.454228 | 10.632569 |
| C | 9.823511  | 1.898285 | 11.862209 |
| C | 9.109130  | 2.788294 | 12.715713 |
| C | 8.146520  | 3.710214 | 12.191837 |
| C | 4.568675  | 7.344359 | 11.486059 |
| C | 6.677092  | 4.700446 | 8.876330  |
| C | 4.838244  | 7.303238 | 12.939371 |
| C | 6.938026  | 4.660570 | 10.283795 |
| C | 7.453865  | 4.581809 | 13.064524 |
| C | 8.590254  | 2.867646 | 9.917997  |
| C | 5.801847  | 6.374925 | 13.430302 |
| C | 6.503278  | 5.492904 | 12.546907 |
| C | 7.714957  | 4.542111 | 14.471962 |
| C | 7.888627  | 3.749469 | 10.801424 |
| C | 6.191116  | 4.774809 | 6.253476  |
| C | 9.391221  | 2.725330 | 14.111279 |
| C | 6.039302  | 6.358789 | 14.835419 |
| C | 8.352990  | 2.883939 | 8.512857  |
| C | 7.033321  | 5.407073 | 15.376327 |
| C | 10.904036 | 1.071718 | 13.691949 |
| C | 3.488260  | 8.171009 | 9.656268  |
| C | 6.245377  | 5.532156 | 11.156467 |
| C | 5.725453  | 5.606683 | 8.324809  |
| C | 8.201579  | 4.468408 | 17.094717 |
| C | 8.666700  | 3.635924 | 15.023524 |
| C | 5.000981  | 6.517318 | 9.236968  |
| C | 4.493438  | 8.017452 | 15.077064 |
| C | 7.358978  | 3.835693 | 7.971888  |
| C | 9.899255  | 1.225653 | 8.271144  |
| H | 8.401195  | 4.437979 | 18.171098 |

|   |           |          |           |
|---|-----------|----------|-----------|
| H | 3.956183  | 8.691225 | 15.752899 |
| H | 2.751358  | 8.875174 | 9.255691  |
| H | 5.991070  | 4.804538 | 5.177153  |
| H | 10.436929 | 0.552341 | 7.595187  |
| H | 11.640963 | 0.367628 | 14.092615 |

**Table S4.** Cartesian coordinates obtained for the optimized geometry of HPC-N<sub>12</sub>Ph<sub>6</sub>.

|   |          |          |          |
|---|----------|----------|----------|
| N | 10.27700 | 1.23800  | 9.58400  |
| N | 4.27400  | 8.17000  | 13.74800 |
| N | 8.88900  | 3.59600  | 16.32200 |
| N | 10.74900 | 1.11200  | 12.34700 |
| N | 3.71900  | 8.21300  | 10.97900 |
| N | 5.47200  | 5.61200  | 7.03500  |
| N | 4.13900  | 7.38400  | 8.76200  |
| N | 5.49400  | 7.24600  | 15.61000 |
| N | 9.07500  | 2.16000  | 7.70900  |
| N | 7.24200  | 5.31800  | 16.66100 |
| N | 10.28800 | 1.87600  | 14.57600 |
| C | 9.52400  | 1.96000  | 10.42500 |
| C | 5.26000  | 6.40900  | 10.64000 |
| C | 9.78300  | 1.90300  | 11.87300 |
| C | 9.02700  | 2.72900  | 12.73200 |
| C | 13.04900 | -0.16400 | 13.34700 |
| H | 12.98600 | 0.01900  | 12.41700 |
| C | 8.02800  | 3.61300  | 12.20600 |
| C | 4.58100  | 7.32100  | 11.47900 |
| C | 6.61100  | 4.63800  | 8.90800  |
| C | 4.84700  | 7.28300  | 12.93300 |
| C | 6.84800  | 4.57200  | 10.31100 |
| C | 7.34500  | 4.47500  | 13.07100 |
| C | 8.51800  | 2.82100  | 9.93800  |
| C | 5.76500  | 6.31800  | 13.42900 |
| C | 6.41700  | 5.40000  | 12.55400 |
| C | 2.59900  | 9.21000  | 9.07800  |
| C | 7.63000  | 4.45700  | 14.46900 |
| C | 7.78200  | 3.65800  | 10.83100 |
| C | 8.47900  | 4.48700  | 18.54100 |
| C | 2.51400  | 9.39800  | 7.70700  |
| H | 3.03000  | 8.85200  | 7.12500  |
| C | 9.33700  | 2.69000  | 14.09900 |
| C | 11.29200 | 1.31500  | 6.13900  |
| H | 10.91800 | 2.16200  | 5.92400  |
| C | 6.03100  | 6.33100  | 14.81000 |
| C | 8.31400  | 2.87300  | 8.55100  |
| C | 6.98300  | 5.33900  | 15.35600 |
| C | 5.99600  | 4.85300  | 4.79400  |
| C | 10.94700 | 1.12000  | 13.67200 |
| C | 1.85300  | 10.00800 | 9.94200  |
| H | 1.91400  | 9.87300  | 10.88000 |

|   |          |          |          |
|---|----------|----------|----------|
| C | 10.94900 | 0.69800  | 7.33600  |
| C | 3.53900  | 8.20500  | 9.64400  |
| C | 6.17500  | 5.45100  | 11.17700 |
| C | 5.70100  | 5.55700  | 8.34600  |
| C | 12.09600 | -0.05300 | 15.54800 |
| H | 11.39700 | 0.23100  | 16.12400 |
| C | 12.17100 | 0.71300  | 5.25600  |
| C | 8.18500  | 4.45400  | 17.08700 |
| C | 8.60500  | 3.59100  | 15.02000 |
| C | 12.04400 | 0.26500  | 14.20000 |
| C | 14.15800 | -0.86300 | 13.84200 |
| C | 4.99800  | 6.48900  | 9.26100  |
| C | 4.64900  | 8.13500  | 15.04300 |
| C | 7.28500  | 3.78400  | 8.00300  |
| C | 3.35900  | 11.34700 | 17.48300 |
| H | 3.08400  | 12.07900 | 18.02300 |
| C | 4.15700  | 9.23300  | 15.92000 |
| C | 1.67500  | 10.38500 | 7.16800  |
| C | 5.45600  | 6.01500  | 4.23900  |
| H | 5.10500  | 6.68800  | 4.81100  |
| C | 10.03600 | 1.39600  | 8.27100  |
| C | 2.87500  | 9.75800  | 15.76400 |
| H | 2.29100  | 9.39300  | 15.11000 |
| C | 12.29400 | -1.23200 | 6.75400  |
| C | 11.46900 | -0.55500 | 7.65500  |
| H | 11.26100 | -0.95200 | 8.49200  |
| C | 9.04800  | 4.64600  | 21.23900 |
| H | 9.23900  | 4.69200  | 22.16800 |
| C | 8.01100  | 5.42800  | 20.72000 |
| C | 12.63500 | -0.57600 | 5.58900  |
| H | 13.21400 | -1.01600 | 4.97900  |
| C | 6.47500  | 3.84400  | 3.96400  |
| H | 6.82600  | 3.04800  | 4.34500  |
| C | 2.44700  | 10.81500 | 16.56500 |
| C | 1.01900  | 11.00000 | 9.43900  |
| C | 13.16900 | -0.78900 | 16.07000 |
| C | 14.17500 | -1.15400 | 15.19300 |
| H | 14.92000 | -1.63200 | 15.53900 |
| C | 4.65000  | 10.85300 | 17.64100 |
| C | 5.42300  | 6.20100  | 2.86100  |
| C | 5.03000  | 9.77100  | 16.86500 |
| H | 5.89400  | 9.39200  | 16.97700 |
| C | 9.51100  | 3.72100  | 19.08300 |
| H | 10.01200 | 3.14000  | 18.52200 |
| C | 7.74300  | 5.32700  | 19.36600 |
| H | 7.03900  | 5.84400  | 18.99300 |
| C | 6.44400  | 3.99200  | 2.57900  |
| C | 0.94100  | 11.15400 | 8.05800  |
| H | 0.35700  | 11.81700 | 7.70900  |
| C | 9.81100  | 3.80200  | 20.43400 |
| C | 5.91600  | 5.17300  | 2.06100  |

|   |          |          |          |
|---|----------|----------|----------|
| H | 5.89000  | 5.28200  | 1.11700  |
| C | 6.16300  | 4.74600  | 6.25800  |
| H | 1.60700  | 10.53300 | 6.14900  |
| H | 0.47300  | 11.60500 | 10.07200 |
| H | 14.93200 | -1.14900 | 13.22200 |
| H | 13.20700 | -1.04800 | 17.06800 |
| H | 10.58400 | 3.24800  | 20.83600 |
| H | 7.46400  | 6.05900  | 21.32600 |
| H | 5.30400  | 11.28000 | 18.31600 |
| H | 1.49000  | 11.19200 | 16.48400 |
| H | 5.04700  | 7.06800  | 2.44700  |
| H | 6.80100  | 3.25000  | 1.95600  |
| H | 12.47400 | 1.18700  | 4.39100  |
| H | 12.63500 | -2.18600 | 6.95200  |
| N | 7.05400  | 3.82700  | 6.70200  |

**Table S5.** Cartesian coordinates obtained for the optimized geometry of **HBC-Ph<sub>6</sub>**.

|   |          |          |          |
|---|----------|----------|----------|
| C | 4.25600  | 0.22000  | 6.32600  |
| H | 4.08400  | 0.62700  | 5.48500  |
| C | 5.05200  | 0.89000  | 7.26000  |
| C | 5.33700  | 0.25500  | 8.46800  |
| H | 5.88400  | 0.70100  | 9.10300  |
| C | 5.94100  | -1.02000 | 11.02600 |
| H | 6.32200  | -0.17400 | 10.82300 |
| C | 6.19300  | -1.57700 | 12.26500 |
| C | 5.64000  | -2.82000 | 12.53300 |
| H | 5.77700  | -3.20600 | 13.39100 |
| C | 4.67100  | -5.53100 | 13.07300 |
| H | 5.12300  | -5.05000 | 13.75600 |
| C | 4.30200  | -6.85100 | 13.31100 |
| C | 3.61300  | -7.51900 | 12.30500 |
| H | 3.40400  | -8.43900 | 12.42400 |
| C | 1.68000  | -8.74000 | 10.52700 |
| H | 1.92100  | -9.16800 | 11.34000 |
| C | 0.72200  | -9.33100 | 9.71100  |
| C | 0.43800  | -8.72300 | 8.48800  |
| H | -0.15700 | -9.15400 | 7.88500  |
| C | -0.40500 | -7.30700 | 6.05100  |
| H | -0.75600 | -8.17300 | 6.23200  |
| C | -0.90000 | -6.60800 | 4.96100  |
| C | -0.29900 | -5.38300 | 4.65900  |
| H | -0.59800 | -4.90000 | 3.89700  |
| C | 0.98000  | -2.89000 | 3.92400  |
| H | 0.38700  | -3.31500 | 3.31600  |
| C | 1.46300  | -1.61800 | 3.61000  |
| C | 2.37800  | -1.04100 | 4.48300  |
| H | 2.73700  | -0.18700 | 4.27700  |
| C | 2.79200  | -1.68300 | 5.65900  |
| C | 3.70900  | -1.03800 | 6.60700  |
| C | 4.00900  | -1.67700 | 7.83600  |

|   |          |           |          |
|---|----------|-----------|----------|
| C | 4.84300  | -1.01000  | 8.77800  |
| C | 5.14800  | -1.64700  | 10.06100 |
| C | 4.61500  | -2.92900  | 10.33900 |
| C | 4.88500  | -3.53000  | 11.59000 |
| C | 4.40300  | -4.88500  | 11.86200 |
| C | 3.65400  | -5.56100  | 10.87300 |
| C | 3.21800  | -6.87900  | 11.12300 |
| C | 2.29800  | -7.53100  | 10.18500 |
| C | 1.92900  | -6.86800  | 9.00000  |
| C | 1.00200  | -7.49600  | 8.11900  |
| C | 0.58500  | -6.79600  | 6.89800  |
| C | 1.15100  | -5.52800  | 6.59800  |
| C | 0.73000  | -4.84700  | 5.44300  |
| C | 1.33500  | -3.55900  | 5.09500  |
| C | 2.25200  | -2.95300  | 5.98800  |
| C | 2.61400  | -3.61800  | 7.21400  |
| C | 3.47000  | -2.97900  | 8.13900  |
| C | 3.79400  | -3.61100  | 9.36500  |
| C | 3.29400  | -4.90300  | 9.63800  |
| C | 2.45400  | -5.55600  | 8.70700  |
| C | 2.09000  | -4.90000  | 7.50600  |
| C | -2.06500 | -7.15900  | 4.11700  |
| C | -2.54000 | -6.43100  | 3.02600  |
| C | -2.64400 | -8.38500  | 4.44300  |
| C | -3.59500 | -6.93000  | 2.26200  |
| H | -2.08400 | -5.46400  | 2.76900  |
| C | -3.69800 | -8.88400  | 3.67800  |
| H | -2.26900 | -8.95900  | 5.30400  |
| C | -4.17400 | -8.15700  | 2.58800  |
| H | -3.97000 | -6.35700  | 1.40100  |
| H | -4.15400 | -9.85100  | 3.93500  |
| H | -5.00500 | -8.55000  | 1.98500  |
| C | -0.00400 | -10.61800 | 10.14400 |
| C | -0.96200 | -11.19400 | 9.30900  |
| C | 0.29600  | -11.21000 | 11.37100 |
| C | -1.62000 | -12.35900 | 9.70100  |
| H | -1.19800 | -10.72700 | 8.34100  |
| C | -0.36100 | -12.37600 | 11.76300 |
| H | 1.05100  | -10.75600 | 12.03000 |
| C | -1.31900 | -12.95100 | 10.92800 |
| H | -2.37400 | -12.81300 | 9.04200  |
| H | -0.12400 | -12.84200 | 12.73000 |
| H | -1.83700 | -13.87000 | 11.23700 |
| C | 4.64400  | -7.54700  | 14.64100 |
| C | 4.26200  | -8.87300  | 14.85300 |
| C | 5.33700  | -6.85400  | 15.63400 |
| C | 4.57200  | -9.50400  | 16.05800 |
| H | 3.71600  | -9.41900  | 14.07000 |
| C | 5.64800  | -7.48600  | 16.83800 |
| H | 5.63900  | -5.81000  | 15.46700 |
| C | 5.26500  | -8.81000  | 17.05000 |

|   |          |           |          |
|---|----------|-----------|----------|
| H | 4.27100  | -10.54800 | 16.22500 |
| H | 6.19400  | -6.93900  | 17.62100 |
| H | 5.51000  | -9.30800  | 18.00000 |
| C | 7.05600  | -0.84500  | 13.30900 |
| C | 7.29400  | -1.43200  | 14.55300 |
| C | 7.60000  | 0.40500   | 13.01300 |
| C | 8.07500  | -0.76900  | 15.49900 |
| H | 6.86500  | -2.41700  | 14.78700 |
| C | 8.38300  | 1.06700   | 13.95900 |
| H | 7.41300  | 0.86800   | 12.03300 |
| C | 8.62000  | 0.48100   | 15.20200 |
| H | 8.26300  | -1.23100  | 16.47900 |
| H | 8.81200  | 2.05200   | 13.72500 |
| H | 9.23600  | 1.00300   | 15.94800 |
| C | 5.60100  | 2.29700   | 6.96100  |
| C | 6.39400  | 2.95100   | 7.90500  |
| C | 5.30700  | 2.91800   | 5.74700  |
| C | 6.89200  | 4.22600   | 7.63500  |
| H | 6.62600  | 2.46200   | 8.86200  |
| C | 5.80600  | 4.19300   | 5.47700  |
| H | 4.68200  | 2.40300   | 5.00300  |
| C | 6.59800  | 4.84700   | 6.42000  |
| H | 7.51700  | 4.74100   | 8.37800  |
| H | 5.57400  | 4.68200   | 4.52000  |
| H | 6.99100  | 5.85100   | 6.20700  |
| C | 0.99800  | -0.88000  | 2.34100  |
| C | 1.49700  | 0.39100   | 2.05100  |
| C | 0.07900  | -1.48200  | 1.48100  |
| C | 1.07600  | 1.05900   | 0.90100  |
| H | 2.22100  | 0.86500   | 2.72900  |
| C | -0.34100 | -0.81300  | 0.33000  |
| H | -0.31400 | -2.48300  | 1.70900  |
| C | 0.15700  | 0.45700   | 0.04100  |
| H | 1.46900  | 2.06000   | 0.67200  |
| H | -1.06500 | -1.28800  | -0.34800 |
| H | -0.17400 | 0.98400   | -0.86600 |

**Table S6.** Cartesian coordinates obtained for the optimized geometry of **HBC-Ph<sub>6</sub>** (90° dihedral).

|   |         |          |          |
|---|---------|----------|----------|
| C | 4.25600 | 0.22000  | 6.32600  |
| H | 4.08400 | 0.62700  | 5.48500  |
| C | 5.05200 | 0.89000  | 7.26000  |
| C | 5.33700 | 0.25500  | 8.46800  |
| H | 5.88400 | 0.70100  | 9.10300  |
| C | 5.94100 | -1.02000 | 11.02600 |
| H | 6.32200 | -0.17400 | 10.82300 |
| C | 6.19300 | -1.57700 | 12.26500 |
| C | 5.64000 | -2.82000 | 12.53300 |
| H | 5.77700 | -3.20600 | 13.39100 |
| C | 4.30200 | -6.85100 | 13.31100 |

|   |          |           |          |
|---|----------|-----------|----------|
| C | 0.72200  | -9.33100  | 9.71100  |
| C | -0.40500 | -7.30700  | 6.05100  |
| C | -0.90000 | -6.60800  | 4.96100  |
| C | -0.29900 | -5.38300  | 4.65900  |
| C | 0.98000  | -2.89000  | 3.92400  |
| H | 0.38700  | -3.31500  | 3.31600  |
| C | 1.46300  | -1.61800  | 3.61000  |
| C | 2.37800  | -1.04100  | 4.48300  |
| H | 2.73700  | -0.18700  | 4.27700  |
| C | 2.79200  | -1.68300  | 5.65900  |
| C | 3.70900  | -1.03800  | 6.60700  |
| C | 4.00900  | -1.67700  | 7.83600  |
| C | 4.84300  | -1.01000  | 8.77800  |
| C | 5.14800  | -1.64700  | 10.06100 |
| C | 4.61500  | -2.92900  | 10.33900 |
| C | 4.88500  | -3.53000  | 11.59000 |
| C | 4.40300  | -4.88500  | 11.86200 |
| C | 3.65400  | -5.56100  | 10.87300 |
| C | 3.21800  | -6.87900  | 11.12300 |
| C | 2.29800  | -7.53100  | 10.18500 |
| C | 1.92900  | -6.86800  | 9.00000  |
| C | 1.00200  | -7.49600  | 8.11900  |
| C | 0.58500  | -6.79600  | 6.89800  |
| C | 1.15100  | -5.52800  | 6.59800  |
| C | 0.73000  | -4.84700  | 5.44300  |
| C | 1.33500  | -3.55900  | 5.09500  |
| C | 2.25200  | -2.95300  | 5.98800  |
| C | 2.61400  | -3.61800  | 7.21400  |
| C | 3.47000  | -2.97900  | 8.13900  |
| C | 3.79400  | -3.61100  | 9.36500  |
| C | 3.29400  | -4.90300  | 9.63800  |
| C | 2.45400  | -5.55600  | 8.70700  |
| C | 2.09000  | -4.90000  | 7.50600  |
| C | 0.43800  | -8.72300  | 8.48800  |
| C | 1.68000  | -8.74000  | 10.52700 |
| C | 3.61300  | -7.51900  | 12.30500 |
| C | 4.67100  | -5.53100  | 13.07300 |
| H | -0.79800 | -8.28100  | 6.25400  |
| H | -0.63600 | -4.83800  | 3.80200  |
| C | 4.64500  | -7.54800  | 14.64100 |
| C | 5.79700  | -8.32700  | 14.74300 |
| C | 3.80300  | -7.39900  | 15.74400 |
| C | 6.10800  | -8.95800  | 15.94800 |
| H | 6.46100  | -8.44400  | 13.87400 |
| C | 4.11400  | -8.03000  | 16.94900 |
| H | 2.89500  | -6.78500  | 15.66300 |
| C | 5.26700  | -8.80900  | 17.05000 |
| H | 7.01700  | -9.57200  | 16.02800 |
| H | 3.45100  | -7.91300  | 17.81800 |
| H | 5.51200  | -9.30700  | 18.00000 |
| C | -0.00400 | -10.61800 | 10.14400 |



|   |          |           |          |
|---|----------|-----------|----------|
| C | -1.20200 | -10.53800 | 10.85400 |
| C | 0.53600  | -11.86500 | 9.82700  |
| C | -1.86000 | -11.70300 | 11.24700 |
| H | -1.62800 | -9.55500  | 11.10400 |
| C | -0.12200 | -13.03000 | 10.21900 |
| H | 1.48100  | -11.92800 | 9.26700  |
| C | -1.32000 | -12.95000 | 10.92900 |
| H | -2.80400 | -11.64000 | 11.80600 |
| H | 0.30400  | -14.01300 | 9.96900  |
| H | -1.83900 | -13.86900 | 11.23900 |
| C | -2.06500 | -7.15900  | 4.11700  |
| C | -1.80326 | -7.96826  | 3.01200  |
| C | -3.38141 | -6.84911  | 4.45990  |
| C | -2.85827 | -8.46694  | 2.24780  |
| H | -0.76549 | -8.21194  | 2.74234  |
| C | -4.43647 | -7.34875  | 3.69540  |
| H | -3.58734 | -6.21135  | 5.33134  |
| C | -4.17531 | -8.15773  | 2.58963  |
| H | -2.65239 | -9.10566  | 1.37606  |
| H | -5.47367 | -7.10534  | 3.96582  |
| H | -5.00633 | -8.55168  | 1.98728  |
| C | 0.99800  | -0.88000  | 2.34100  |
| C | 1.72923  | -0.99844  | 1.15786  |
| C | -0.15361 | -0.09378  | 2.37298  |
| C | 1.30874  | -0.33004  | 0.00832  |
| H | 2.63732  | -1.61869  | 1.13240  |
| C | -0.57467 | 0.57373   | 1.22251  |
| H | -0.72979 | -0.00047  | 3.30451  |
| C | 0.15587  | 0.45502   | 0.04005  |
| H | 1.88421  | -0.42328  | -0.92390 |
| H | -1.48332 | 1.19274   | 1.24840  |
| H | -0.17604 | 0.98195   | -0.86602 |
| C | 5.60200  | 2.29700   | 6.96100  |
| C | 6.76476  | 2.44537   | 6.20483  |
| C | 4.93761  | 3.42376   | 7.44563  |
| C | 7.26392  | 3.71960   | 5.93519  |
| H | 7.28963  | 1.55707   | 5.82256  |
| C | 5.43542  | 4.69808   | 7.17394  |
| H | 4.02023  | 3.30680   | 8.04158  |
| C | 6.59816  | 4.84628   | 6.41876  |
| H | 8.17993  | 3.83647   | 5.33818  |
| H | 4.91055  | 5.58638   | 7.55622  |
| H | 6.99149  | 5.85099   | 6.20500  |
| C | 7.05600  | -0.84500  | 13.30900 |
| C | 8.44668  | -0.95975  | 13.26905 |
| C | 6.44984  | -0.06659  | 14.29454 |
| C | 9.22853  | -0.29747  | 14.21484 |
| H | 8.92542  | -1.57297  | 12.49201 |
| C | 7.23194  | 0.59666   | 15.24028 |
| H | 5.35419  | 0.02437   | 14.32650 |
| C | 8.62148  | 0.48115   | 15.19997 |

|   |          |          |          |
|---|----------|----------|----------|
| H | 10.32443 | -0.38746 | 14.18282 |
| H | 6.75256  | 1.21105  | 16.01685 |
| H | 9.23736  | 1.00473  | 15.94549 |
| H | -0.20827 | -9.19256 | 7.83464  |
| H | 2.06081  | -9.25086 | 11.52480 |
| H | 3.38544  | -8.51743 | 12.43295 |
| H | 5.23160  | -4.94530 | 13.74046 |

**Table S7.** Cartesian coordinates obtained for the optimized geometry of **HBC-Ph<sub>6</sub>** (45° dihedral).

|   |          |          |          |
|---|----------|----------|----------|
| C | 0.76000  | 1.20900  | 0.07100  |
| C | -0.72400 | 1.25500  | -0.07100 |
| C | -1.42400 | 0.10000  | -0.10900 |
| C | -0.75900 | -1.14700 | -0.02200 |
| C | 0.65200  | -1.22200 | 0.12200  |
| C | 1.41000  | -0.03400 | 0.16400  |
| C | 1.50500  | 2.39700  | 0.06900  |
| C | 0.86100  | 3.63700  | -0.06900 |
| C | 3.05900  | 4.70200  | -0.25200 |
| C | 2.99700  | 2.36100  | 0.15900  |
| C | -1.38900 | 2.50100  | -0.12900 |
| C | -2.81300 | 2.55900  | -0.22200 |
| C | -2.67200 | 4.95900  | -0.01100 |
| C | -0.63400 | 3.70200  | -0.06100 |
| C | -2.91100 | 0.14600  | -0.26000 |
| C | -3.64800 | -1.06100 | -0.32100 |
| C | -5.66300 | 0.18400  | -0.68700 |
| C | -3.56000 | 1.34500  | -0.34600 |
| C | -1.55100 | -2.40000 | -0.01500 |
| C | -0.88900 | -3.63000 | 0.15700  |
| C | -3.03000 | -4.72100 | 0.36400  |
| C | -2.95800 | -2.36400 | -0.09100 |
| C | 1.31000  | -2.47700 | 0.18800  |
| C | 2.81300  | -2.53500 | 0.26800  |
| C | 2.68300  | -4.88000 | 0.03600  |
| C | 0.61000  | -3.64800 | 0.13800  |
| C | 2.89000  | -0.08500 | 0.33000  |
| C | 3.64400  | 1.11500  | 0.38200  |
| C | 5.64700  | -0.17000 | 0.78700  |
| C | 3.55600  | -1.33100 | 0.42200  |
| C | 1.66000  | 4.77400  | -0.28200 |
| C | 3.67800  | 3.52400  | -0.02400 |
| C | -3.41200 | 3.78100  | -0.16800 |
| C | -1.27900 | 4.88400  | 0.04700  |
| C | -5.02900 | -0.99600 | -0.59000 |
| C | -4.97000 | 1.33200  | -0.55900 |
| C | -1.62700 | -4.74500 | 0.38700  |
| C | -3.67200 | -3.56400 | 0.12100  |
| C | 3.40500  | -3.75400 | 0.16700  |
| C | 1.28400  | -4.81800 | 0.02000  |

|   |          |          |          |
|---|----------|----------|----------|
| C | 5.02900  | 1.01700  | 0.65700  |
| C | 4.95300  | -1.31800 | 0.66900  |
| H | 1.21700  | 5.72600  | -0.53200 |
| H | 4.75400  | 3.54600  | -0.02000 |
| H | -4.47600 | 3.90600  | -0.22200 |
| H | -0.74100 | 5.80200  | 0.21900  |
| H | -5.60700 | -1.89100 | -0.74900 |
| H | -5.54200 | 2.23900  | -0.64200 |
| H | -1.16000 | -5.68300 | 0.64400  |
| H | -4.74900 | -3.58000 | 0.11800  |
| H | 4.47400  | -3.87000 | 0.17200  |
| H | 0.76300  | -5.74800 | -0.14400 |
| H | 5.63200  | 1.89500  | 0.82000  |
| H | 5.51200  | -2.22900 | 0.79500  |
| C | -3.35500 | 6.27900  | 0.08700  |
| C | -2.83400 | 7.39600  | -0.57900 |
| C | -4.52100 | 6.42100  | 0.84900  |
| C | -3.44500 | 8.66200  | -0.48600 |
| H | -1.94600 | 7.27200  | -1.18400 |
| C | -5.18900 | 7.65700  | 0.95000  |
| H | -4.90300 | 5.55900  | 1.37800  |
| C | -4.63000 | 8.77100  | 0.28000  |
| H | -5.11700 | 9.72400  | 0.35500  |
| C | 3.85900  | 5.93900  | -0.47400 |
| C | 4.98600  | 5.92200  | -1.30600 |
| C | 3.48600  | 7.13900  | 0.14500  |
| C | 5.76600  | 7.07600  | -1.51500 |
| H | 5.25000  | 4.99800  | -1.80200 |
| C | 4.21000  | 8.33000  | -0.05800 |
| H | 2.62400  | 7.13800  | 0.79800  |
| C | 5.35600  | 8.27600  | -0.88600 |
| H | 5.92900  | 9.17000  | -1.04300 |
| C | 7.11300  | -0.21100 | 1.05200  |
| C | 7.62900  | -1.02900 | 2.06700  |
| C | 7.98800  | 0.56900  | 0.28200  |
| C | 9.01500  | -1.09000 | 2.32300  |
| H | 6.92800  | -1.60200 | 2.65500  |
| C | 9.38000  | 0.55100  | 0.51100  |
| H | 7.56100  | 1.17500  | -0.50200 |
| C | 9.86800  | -0.29200 | 1.53200  |
| H | 10.93200 | -0.32600 | 1.71400  |
| C | 3.35600  | -6.20300 | -0.08200 |
| C | 2.88600  | -7.29700 | 0.65500  |
| C | 4.44900  | -6.37600 | -0.94100 |
| C | 3.47300  | -8.57200 | 0.53900  |
| H | 2.05500  | -7.14700 | 1.33000  |
| C | 5.08900  | -7.62300 | -1.07500 |
| H | 4.79000  | -5.52800 | -1.52000 |
| C | 4.58200  | -8.71400 | -0.32800 |
| H | 5.05000  | -9.67500 | -0.42300 |
| C | -3.79700 | -5.97500 | 0.60100  |

|   |           |          |          |
|---|-----------|----------|----------|
| C | -4.92700  | -5.97600 | 1.42800  |
| C | -3.39200  | -7.17200 | -0.00500 |
| C | -5.67700  | -7.14800 | 1.64800  |
| H | -5.21600  | -5.05300 | 1.91100  |
| C | -4.08700  | -8.37700 | 0.20700  |
| H | -2.52900  | -7.15500 | -0.65700 |
| C | -5.23600  | -8.34400 | 1.03300  |
| H | -5.78700  | -9.25000 | 1.19700  |
| C | -7.13700  | 0.21400  | -0.91500 |
| C | -7.69200  | 1.08000  | -1.86900 |
| C | -7.98100  | -0.62100 | -0.16800 |
| C | -9.08600  | 1.13700  | -2.08200 |
| H | -7.01600  | 1.69500  | -2.44300 |
| C | -9.37700  | -0.61500 | -0.36200 |
| H | -7.52600  | -1.26100 | 0.57200  |
| C | -9.90600  | 0.27900  | -1.31800 |
| H | -10.97400 | 0.30600  | -1.47000 |
| H | -6.49100  | 7.74400  | 1.77900  |
| H | -2.80400  | 9.86300  | -1.21700 |
| H | 3.72800   | 9.62900  | 0.62700  |
| H | 7.01900   | 6.98600  | -2.41600 |
| H | 2.88700   | -9.74700 | 1.35400  |
| H | 6.30100   | -7.75100 | -2.02600 |
| H | -3.57500  | -9.67000 | -0.46800 |
| H | -6.93400  | -7.08000 | 2.54500  |
| H | 9.62000   | -1.98900 | 3.42400  |
| H | 10.37000  | 1.40500  | -0.31200 |
| H | -9.73400  | 2.09300  | -3.10700 |
| H | -10.33100 | -1.53700 | 0.42900  |

## Crystallographic Information

CCDC deposition number 2335088 contains the supplementary crystallographic data for this paper.<sup>13</sup> These data can be obtained free of charge from The Cambridge Crystallographic Data Centre via [www.ccdc.cam.ac.uk/data\\_request/cif](http://www.ccdc.cam.ac.uk/data_request/cif).

**Refinement Details.** In each case, crystals were mounted on a glass fiber or MiTeGen loop using Paratone oil, then placed on the diffractometer under a constant nitrogen stream. Low temperature (175 K) X-ray data were obtained on a Bruker D8 VENTURE Kappa Duo PHOTON 100 CMOS based diffractometer (Mo I $\mu$ S HB micro-focus sealed X-ray tube,  $K\alpha = 0.71073 \text{ \AA}$  or Cu I $\mu$ S HB micro-focused X-ray tube,  $K\alpha = 1.54178$ ). All diffractometer manipulations, including data collection, integration, and scaling were carried out using the Bruker APEXII software.<sup>14</sup> Absorption corrections were applied using SADABS.<sup>15</sup> Space groups were determined on the basis of systematic absences and intensity statistics and the structures were solved in the Olex 2 software interface<sup>16</sup> by intrinsic phasing using XT (incorporated into SHELXTL)<sup>17</sup> and refined by full-matrix least squares on F2. All non-hydrogen atoms were refined using anisotropic displacement parameters, except in some cases with heavily distorted solvent. Hydrogen atoms were placed in the idealized positions and refined using a riding model. The structure was refined (weighted least squares refinement on F2) to convergence. Graphical representation of structures with 50% probability thermal ellipsoids was generated using Diamond 3 visualization software.<sup>18</sup>

**Table S8.** Crystal data and structure refinement for **HPC-N<sub>12</sub>(Ar<sup>tBu</sup>)<sub>6</sub>**.

|                                     |                                                                            |
|-------------------------------------|----------------------------------------------------------------------------|
| CCDC Number <sup>6</sup>            | 2335088                                                                    |
| Empirical formula                   | C <sub>116.94</sub> H <sub>128.94</sub> Cl <sub>8.84</sub> N <sub>12</sub> |
| Formula weight                      | 2015.80                                                                    |
| Temperature/K                       | 175.0                                                                      |
| Crystal system                      | Triclinic                                                                  |
| Space group                         | P-1                                                                        |
| a/Å                                 | 14.3540(6)                                                                 |
| b/Å                                 | 18.2341(6)                                                                 |
| c/Å                                 | 23.2636(10)                                                                |
| α/°                                 | 110.586(3)                                                                 |
| β/°                                 | 101.322(3)                                                                 |
| γ/°                                 | 93.081(3)                                                                  |
| Volume/Å <sup>3</sup>               | 5538.9(4)                                                                  |
| Z                                   | 2                                                                          |
| ρ <sub>calc</sub> g/cm <sup>3</sup> | 1.209                                                                      |
| μ/mm <sup>-1</sup>                  | 2.448                                                                      |
| Abs. Correction                     | Semi-empirical                                                             |
| Crystal size/mm <sup>3</sup>        | 0.2 × 0.2 × 0.1                                                            |
| Radiation                           | CuKα (λ = 1.54178)                                                         |
| 2θ range/°                          | 5.344 to 133.268                                                           |
| GOF                                 | 1.050                                                                      |
| Diffractometer                      | PHOTON                                                                     |

$$^aR_1 = \frac{\sum ||F_o| - |F_c||}{\sum |F_o|}, \quad ^b wR_2 = \left[ \frac{\sum [w(F_o^2 - F_c^2)^2]}{\sum [w(F_o^2)]} \right]^{1/2}$$

**Table S9.** Comparison of select bond lengths between **2,9-bis(2,6-dimethoxyphenyl)-1,10-phenanthroline** (left) and **HPC-N<sub>12</sub>(Ar<sup>tBu</sup>)<sub>6</sub>** (right, truncated structure).

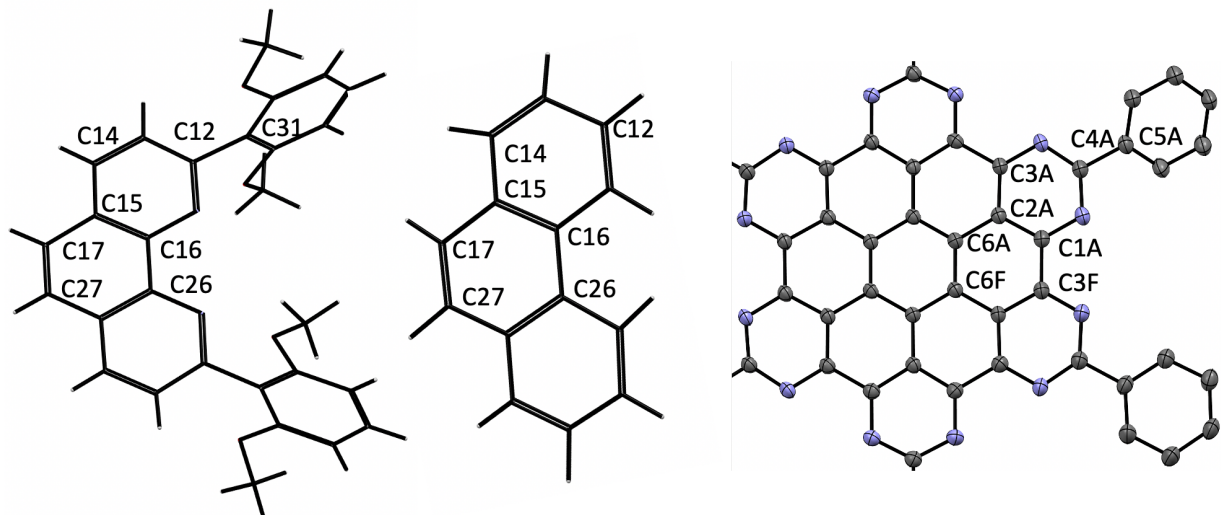

| <b>2,9-bis(2,6-dimethoxyphenyl)-1,10-phenanthroline</b><br>bond lengths (Å) <sup>19</sup> | <b>Decamethylphenanthrene</b><br>bond lengths (Å) <sup>20</sup> | <b>HPC-N<sub>12</sub>(Ar<sup>tBu</sup>)<sub>6</sub></b><br>bond lengths (Å) |
|-------------------------------------------------------------------------------------------|-----------------------------------------------------------------|-----------------------------------------------------------------------------|
| C16-C26: 1.457                                                                            | C16'-C26': 1.453                                                | C3F-C1A: 1.480(2)                                                           |
| C12-C31: 1.508                                                                            | <i>N/A</i>                                                      | C4A-C5A: 1.486(2)                                                           |
| C15-C14: 1.415                                                                            | C15'-C14': 1.420                                                | C3A-C2A: 1.412(4)                                                           |
| C17-C27: 1.356                                                                            | C17'-C27': 1.332                                                | C6A-C6F: 1.408(4)                                                           |
| C17-C15: 1.461                                                                            | C17'-C15': 1.446                                                | C6A-C2A: 1.427(3)                                                           |
| C15-C16: 1.425                                                                            | C15'-C16': 1.393                                                | C2A-C1A: 1.406(3)                                                           |

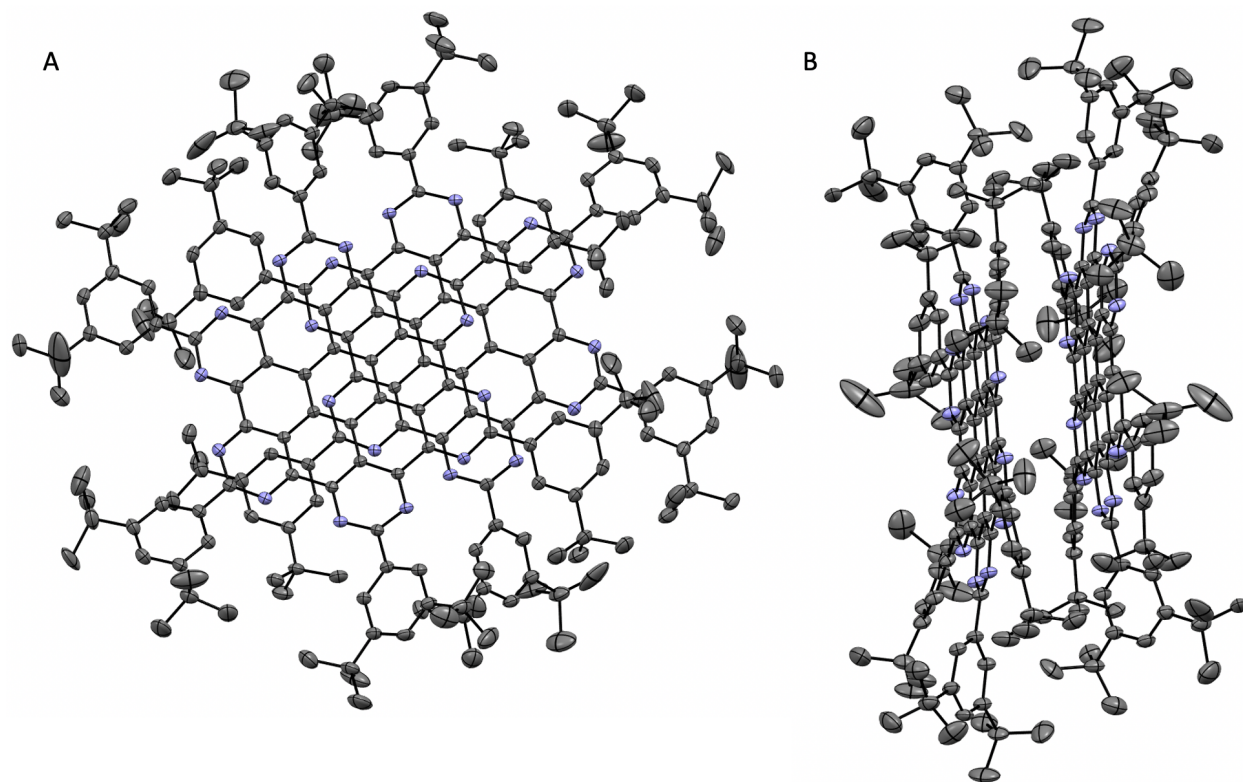

**Figure S22.** A. Top-down view of HPC-N<sub>12</sub>(Ar<sup>tBu</sup>)<sub>6</sub> unit cell and B. side-on view, each highlighting optimal  $\pi$  stacking requires each unit to be offset.



## References

- (1) Pangborn, A. B.; Giardello, M. A.; Grubbs, R. H.; Rosen, R. K.; Timmers, F. J. Safe and Convenient Procedure for Solvent Purification. *Organometallics* **1996**, *15* (5), 1518–1520.
- (2) Huang, J.; Chan, J.; Chen, Y.; Borths, C. J.; Baucom, K. D.; Larsen, R. D.; Faul, M. M. A Highly Efficient Palladium/Copper Cocatalytic System for Direct Arylation of Heteroarenes: An Unexpected Effect of Cu(Xantphos)I. *J. Am. Chem. Soc.* **2010**, *132* (11), 3674–3675.
- (3) Low, C. H.; Rosenberg, J. N.; Lopez, M. A.; Agapie, T. Oxidative Coupling with Zr(IV) Supported by a Noninnocent Anthracene-Based Ligand: Application to the Catalytic Cotrimerization of Alkynes and Nitriles to Pyrimidines. *J. Am. Chem. Soc.* **2018**, *140* (38), 11906–11910.
- (4) Qiu, S.; Zhang, C.; Qiu, R.; Yin, G.; Huang, J. One-Pot Domino Synthesis of Diarylalkynes/1,4-Diaryl-1,3-Diynes by [9,9-Dimethyl-4,5-Bis(Diphenylphosphino)Xanthene] (Xantphos)–Copper(I) Iodide–Palladium(II) Acetate-Catalyzed Double Sonogashira-Type Reaction. *Adv. Synth. Catal.* **2018**, *360* (2), 313–321.
- (5) Stolley, R. M.; Maczka, M. T.; Louie, J. Nickel-Catalyzed [2+2+2] Cycloaddition of Diynes and Cyanamides. *European J. Org. Chem.* **2011**, *2011* (20-21), 3815–3824.
- (6) Rickhaus, M.; Belanger, A. P.; Wegner, H. A.; Scott, L. T. An Oxidation Induced by Potassium Metal. Studies on the Anionic Cyclodehydrogenation of 1,1'-Binaphthyl to Perylene. *J. Org. Chem.* **2010**, *75* (21), 7358–7364.
- (7) Draper, S. M.; Gregg, D. J.; Schofield, E. R.; Browne, W. R.; Duati, M.; Vos, J. G.; Passaniti, P. Complexed Nitrogen Heterosuperbenzene: The Coordinating Properties of a Remarkable Ligand. *J. Am. Chem. Soc.* **2004**, *126* (28), 8694–8701.
- (8) Herwig, P. T.; Enkelmann, V.; Schmelz, O.; Müllen, K. Synthesis and Structural Characterization of Hexa-Tert-Butyl- Hexa-Peri-Hexabenzocoronene, Its Radical Cation Salt and Its Tricarbonylchromium Complex. *Chem. – A Eur. J.* **2000**, *6* (10), 1834–1839.
- (9) Haines, P.; Reger, D.; Träg, J.; Strauss, V.; Lungerich, D.; Zahn, D.; Jux, N.; Guldi, D. M. On the Photophysics of Nanographenes – Investigation of Functionalized Hexa-Peri-Hexabenzocoronenes as Model Systems. *Nanoscale* **2021**, *13* (2), 801–809.
- (10) Neese, F. The ORCA Program System. *WIREs Comput. Mol. Sci.* **2012**, *2* (1), 73–78.
- (11) Stephens, P. J.; Devlin, F. J.; Chabalowski, C. F.; Frisch, M. J. Ab Initio Calculation of Vibrational Absorption and Circular Dichroism Spectra Using Density Functional Force Fields. *J. Phys. Chem.* **1994**, *98* (45), 11623–11627.
- (12) Krishnan, R.; Binkley, J. S.; Seeger, R.; Pople, J. A. Self-consistent Molecular Orbital Methods. XX. A Basis Set for Correlated Wave Functions. *J. Chem. Phys.* **1980**, *72* (1), 650–654.
- (13) Schäfer, J.; Holzapfel, M.; Mladenova, B.; Kattinig, D.; Krummenacher, I.; Braunschweig, H.; Grampp, G.; Lambert, C. Hole Transfer Processes in Meta- and Para-Conjugated Mixed Valence Compounds: Unforeseen Effects of Bridge Substituents and Solvent Dynamics. *J. Am. Chem. Soc.* **2017**, *139* (17), 6200–6209.
- (14) APEX2, Version 2 User Manual, M86-E01078, Bruker Analytical X-Ray Systems, Madison, WI, June 2006.
- (15) Sheldrick, G. M. *SADABS (Version 2008/1): Program for Absorption Correction for Data from Area Detector Frames*; University of Göttingen: 2008, 2008.
- (16) Dolomanov, O. V.; Bourhis, L. J.; Gildea, R. J.; Howard, J. A. K.; Puschmann, H. No. *J. Appl. Crystallogr.* **2009**, *42*, 339–341.

- (17) Sheldrick, G. M. No Title. *Acta Crystallogr. Sect. A* **2008**, *64*, 112–122.
- (18) Brandenburg, K. (1999). DIAMOND. Crystal Impact GbR, Bonn, Germany.
- (19) Bolte, M. CCDC 2001096. *CSD Commun.* **2020**.
- (20) Ermer, O.; Neudörfl, J. Comparative Supramolecular Chemistry of Coronene and Hexahelicene: Helix Alignment in Crystalline Complexes with Trimesic Acid (=Benzene-1,3,5-Tricarboxylic Acid) and  $\pi$ -Acceptor Compounds. *Helv. Chim. Acta* **2001**, *84*(6), 1268–1313.
